1 **High-effect gene-coding variants impact cognition, mental well-being, and neighborhood**  
2 **safety substrates in brain morphology**

3  
4 Jakub Kopal<sup>1,2</sup>, Guillaume Huguet<sup>3</sup>, Justin Marotta<sup>1,2</sup>, Shambhavi Aggarwal<sup>1,2</sup>, Nicole Osayande<sup>1,2</sup>,  
5 Kuldeep Kumar<sup>3</sup>, Zohra Saci<sup>3</sup>, Martineau Jean-Louis<sup>3</sup>, Xiaoqian J Chai<sup>4</sup>, Tian Ge<sup>5</sup>, B.T. Thomas Yeo<sup>6,7,8</sup>,  
6 Paul M Thompson<sup>9</sup>, Carrie E Bearden<sup>10</sup>, Ole A. Andreassen<sup>11,12</sup>, Sébastien Jacquemont<sup>3,13</sup>,  
7 Danilo Bzdok<sup>1,2,14, \*</sup>

8  
9 <sup>1</sup>Department of Biomedical Engineering, Faculty of Medicine, McGill University, Montreal, Quebec, Canada

10 <sup>2</sup>Mila - Quebec Artificial Intelligence Institute, Montréal, Quebec, Canada

11 <sup>3</sup>Centre de recherche CHU Sainte-Justine, Montréal, Quebec, Canada

12 <sup>4</sup>Department of Neurology and Neurosurgery, McGill University, USA

13 <sup>5</sup>Psychiatric and Neurodevelopmental Genetics Unit, Center for Genomic Medicine, Massachusetts General  
14 Hospital, Boston, Massachusetts, United States of America

15 <sup>6</sup>Department of Electrical and Computer Engineering, National University of Singapore, Singapore, Singapore.

16 <sup>7</sup>Centre for Sleep & Cognition & Centre for Translational Magnetic Resonance Research, Yong Loo Lin School of  
17 Medicine, Singapore, Singapore.

18 <sup>8</sup>N.1 Institute for Health & Institute for Digital Medicine, National University of Singapore, Singapore,  
19 Singapore.

20 <sup>9</sup>Imaging Genetics Center, Stevens Neuroimaging and Informatics Institute, Keck School of Medicine of USC,  
21 Los Angeles, CA, USA

22 <sup>10</sup>Semel Institute for Neuroscience and Human Behavior, Departments of Psychiatry and Biobehavioral  
23 Sciences and Psychology, UCLA, Los Angeles, CA, USA

24 <sup>11</sup>NORMENT, Division of Mental Health and Addiction, Oslo University Hospital and University of Oslo, Oslo,  
25 Norway

26 <sup>12</sup>KG Jebsen Centre for Neurodevelopmental Disorders, University of Oslo, Oslo, Norway

27 <sup>13</sup>Department of Pediatrics, University of Montréal, Montréal, Quebec, Canada

28 <sup>14</sup>TheNeuro - Montreal Neurological Institute (MNI), McConnell Brain Imaging Centre, Faculty of Medicine,  
29 McGill University, Montreal, Quebec, Canada

30

31 **Corresponding author**

32 \* Danilo Bzdok, [danilo.bzdok@mcgill.ca](mailto:danilo.bzdok@mcgill.ca)

33

34 **Abstract**

35 Our genetic makeup, together with environmental and social influences, shape our brain's  
36 development. Yet, the imaging genetics field has struggled to integrate all these modalities to  
37 investigate the interplay between genetic blueprint, environment, human health, daily living skills and  
38 outcomes. Hence, we interrogated the Adolescent Brain Cognitive Development (ABCD) cohort to  
39 outline the effects of rare high-effect genetic variants on brain architecture and corresponding  
40 implications on cognitive, behavioral, psychosocial, and socioeconomic traits. Specifically, we  
41 designed a holistic pattern-learning algorithm that quantitatively dissects the impacts of copy number  
42 variations (CNVs) on brain structure and 962 behavioral variables spanning 20 categories in 7,657  
43 adolescents. Our results reveal associations between genetic alterations, higher-order brain networks,  
44 and specific parameters of the family well-being (increased parental and child stress, anxiety and  
45 depression) or neighborhood dynamics (decreased safety); effects extending beyond the impairment  
46 of cognitive ability or language capacity, dominantly reported in the CNV literature. Our investigation  
47 thus spotlights a far-reaching interplay between genetic variation and subjective life quality in  
48 adolescents and their families.

## 49 Introduction

50 Our genes collectively provide the blueprint of our biological makeup upon which the dynamic  
51 interplay of environmental influences, social interactions, and developmental experiences unfolds.  
52 The genetic architecture contributes directly and indirectly to the wiring of brain circuits and provides  
53 the foundation of behavior repertoire manifestation<sup>1,2</sup>. By understanding genetic underpinnings, we  
54 can unravel the origins of individual differences in cognitive processes and behaviors, which in turn  
55 offers insights into both adaptive capacities and developmental vulnerabilities<sup>3</sup>. Identifying biological  
56 determinants behind brain organization and behavioral differentiation necessitates an integrative  
57 approach that cuts across an array of disciplines. Nevertheless, neuroimaging genetics, psychiatric  
58 genetics, and environmental factor studies have been conducted in isolated silos. Without the  
59 integration of these disciplines, the full extent of genetic influences on human health will remain  
60 concealed.

61  
62 The genetic underpinnings have been traditionally studied through genome-wide association  
63 studies (GWAS). However, GWAS have been restricted to common variants which mainly reside in  
64 non-coding regions and exert only small effects on phenotypes<sup>4</sup>. Compared to incumbent single  
65 nucleotide polymorphism analyses in GWAS, protein-coding copy number variations (CNVs) represent  
66 rare and consequential genome-wide perturbations invariably leading to a large decrease or increase  
67 in gene expression - a currently under-exploited genetic phenomenon. This class of genetic variation  
68 is defined as either a deletion or duplication of sequences of nucleotides more than 1,000 base pairs  
69 long<sup>5,6</sup>. Moreover, given recently accumulating evidence, many protein-coding CNVs are now being  
70 understood to exert body-wide implications<sup>7,8</sup> as well as increase the risk of neurodevelopmental  
71 disorders, including intellectual disability, autism spectrum disorder or schizophrenia<sup>9-11</sup>. Since  
72 protein-coding CNVs are cumulatively relatively frequent in the population and have the potential for  
73 substantial effects on a given phenotype, they represent a potent imaging-genetics tool, which we will  
74 here deploy for interrogating the effects of genetic modifications on brain physicality and behavioral  
75 differentiation in adolescents.

76  
77 Adolescence is a critical juncture where the seeds of mental health and well-being are sown.  
78 During this period, brain circuits and behavioral tendencies undergo dynamic changes shaped by  
79 genetic factors, environmental influences, and their interactions<sup>12,13</sup>. Importantly, adolescence is also  
80 a life stage during which symptoms of numerous psychiatric disorders become apparent<sup>14</sup>. Recent  
81 findings underscore the necessity of adopting a multidimensional and interdisciplinary approach that  
82 cuts across sociology, psychology, and biology, conventionally studied in isolation. Such a holistic  
83 perspective is essential for a more nuanced understanding of the intricate interplay of genetic, socio-  
84 economic, and environmental factors influencing healthy children's development<sup>15</sup>. By integrating  
85 information from cognitive assessments, genetic information, and socio-environmental measures, we  
86 can identify potential risk factors as well as unveil protective elements contributing to resilience in  
87 individuals navigating the complexities of adolescence<sup>16,17</sup>. Consequently, the analysis of CNVs in  
88 adolescents is uniquely positioned to carve out important interactions between our genetic heritage,  
89 the environmental milieu, and the intricacies of cognitive and social development, laying the  
90 groundwork for a more comprehensive approach to mental health.

91  
92 In the present study, we leveraged under-studied rare genetic alterations (genome-wide  
93 CNVs) with strong downstream effects. We interrogated the Adolescent Brain Cognitive Development

94 (ABCD) study<sup>18</sup>, which represents one of the largest collections of brain images and genetic profiles  
95 from over 10,000 children aged 9 to 11 years at baseline. Moreover, these adolescents are  
96 prospectively deeply phenotyped by means of an extensive battery of cognitive, behavioral, clinical,  
97 psychosocial, and socioeconomic measures. Benefiting from this comprehensive multimodal data, we  
98 investigated the effects of a genomic deletion or duplication on patterns of individual subjects' brain  
99 architecture linked with cognitive, behavioral, psychosocial, and socioeconomic measures in a single  
100 multivariate analysis. Specifically, we first probed the carefully curated data from 7,657 children for  
101 the presence of CNVs. We then deployed multivariate pattern learning algorithms in the children  
102 without any CNV to estimate modes of population covariation between brain architecture,  
103 represented by 148 regional atlas volumes and ~1000 behavioral variables spanning 20 rich categories.  
104 Finally, we quantified the effects of deletions and duplications on the revealed canonical modes. The  
105 robustness of derived modes and CNV-induced differences were assessed by cross-validation and  
106 permutation testing<sup>15,19</sup>. This multidimensional and doubly multivariate framework revealing the  
107 multi-faceted relationships between genes, brain architecture, and behavior paves the way for  
108 innovation in neuroscience, genetics, and personalized medicine.  
109

## 110 Results

### 111 Genome-wide mutations alter patterns of brain and behavior

112 We used a pattern-learning approach to analyze the impact of genome-wide CNVs in the ABCD  
113 cohort by means of its uniquely deep phenotype profiling. To this end, in the group of 7,657 children  
114 that passed genetic and MRI quality control, we first identified 514 children carrying at least one  
115 genomic deletion and 1,472 children carrying at least one duplication that fully encompassed at least  
116 one gene. The 136 children that carried both a deletion and duplication were not analyzed in this study  
117 due to the limited sample size. The remaining 73% (5,535) of the children did not carry any protein-  
118 coding CNV larger than 50kb across the genome (Fig. 1A). These participant groups (deletions,  
119 duplications, controls) showed similar proportions of sex (percentage of females: 44-48%) and  
120 distributions of age (Fig. 1A).

121 Next, we zoomed in on the CNVs that we localized in the children's genetic profiles (Fig. 1B).  
122 Almost 60% of deletions encompassed a single complete gene. Duplications generally encompassed  
123 more affected genes than deletions, although a single-gene duplication was the most common (~30%  
124 of cases). Besides the genetic profiling, the ABCD resource provides brain and behavior measurements  
125 for each participant: brain measurements were represented by 148 regional brain volumes defined  
126 according to the Desikan-Killiany standard atlas. Behavioral measures drew across 962 different  
127 phenotypes spanning 20 categories for in-depth follow-up analyses.

128 In order to investigate how genetic mutations impact brain and behavior, we first established  
129 the link between measurements of brain architecture and behavior using a single holistic multivariate  
130 model. Specifically, we brought to bear a partial least squares (PLS) model that maximizes the  
131 covariation between the weighted set (linear combination) of sociodemographics, family well-being,  
132 physical characteristics, or behavioral measures and a weighted set (linear combination) of brain  
133 structure measures (Fig. 1C). The PLS model parameters were initially estimated in participants  
134 without any CNV, as a reference group, to reveal the modes of covariation that reflect the general  
135 population. The subject-wise expressions of each brain-behavior covariation mode (i.e., canonical  
136 variables) will henceforth be called *scores*. In other words, these *scores* are calculated as a linear  
137 combination (weighted sum) of the original variables with PLS weights. Each identified PLS mode can  
138 thus be characterized by a set of brain and behavior scores for all subjects and for each PLS mode.  
139 Using a robust protocol for cross-validation and empirical permutation testing<sup>15</sup>, we identified three  
140 significant PLS modes (Sup. Fig. 1). The revealed major sources of covariation in adolescents captured  
141 the ways in which brain features are intertwined with early life events, mental well-being, or  
142 environment.

143 In the next step, we wished to evaluate if carrying a coding CNV led to statistically significant  
144 shifts in the observed brain and behavior patterns. To that end, we devised a bootstrap validation  
145 scheme that compares PLS scores between controls and CNV carriers (Sup. Fig. 2). In this CNV-control  
146 comparison, deletion and duplication carriers are pitted against control participants not used to derive  
147 PLS parameters in order to prevent overfitting (cf. Methods for details). The comparison was based  
148 on separately testing the difference in the average behavior scores and the average brain scores. We  
149 were thus able to assess mode expression differences separately for each CNV status (Fig. 1C). We  
150 found deletions to impact behavior scores in all three identified modes ( $p\text{-value}_{\text{mode1}} = 10^{-4}$ ,  $p\text{-value}_{\text{mode2}} = 0.014$ ,  $p\text{-value}_{\text{mode3}} = 0.041$ ). By contrast, duplications affected only the first behavioral  
151 mode ( $p\text{-value}_{\text{mode1}} = 10^{-4}$ ,  $p\text{-value}_{\text{mode2}} = 0.151$ ,  $p\text{-value}_{\text{mode3}} = 0.336$ ). Furthermore, there was a  
152 significant shift in brain scores for the first two modes in duplications ( $p\text{-value}_{\text{mode1}} = 10^{-4}$ ,  $p\text{-value}_{\text{mode2}} =$   
153  $= 0.027$ ,  $p\text{-value}_{\text{mode3}} = 0.097$ ) and the second mode in deletions ( $p\text{-value}_{\text{mode1}} = 0.395$ ,  $p\text{-value}_{\text{mode2}} =$

155 0.043,  $p\text{-value}_{\text{mode3}} = 0.052$ ). A sensitivity analysis demonstrated that the obtained differences were  
156 not driven by the presence of recurrent CNVs, such as 16p11.2 or 22q11.2 (Sup. Fig. 3). These results  
157 revealed that carrying a CNV significantly impacts the expression of patterns linking brain architecture  
158 and diverse aspects of cognitive, psychosocial, and socioeconomic measures in our ABCD sample.  
159 Therefore, genetic factors shape individual differences in brain-behavior correspondences in  
160 adolescents.

161

### 162 **Canonical modes bind patterns of whole-brain architecture with real-life functioning, mental well-** 163 **being and environment**

164 After identifying robust deviations of brain-behavior patterns in CNV carriers at population  
165 scale, we examined each revealed mode in more detail. The dominant mode portrayed the ties  
166 between large-scale brain networks with sociodemographics and cognition. Specifically, we first re-  
167 expressed the difference in PLS scores between controls and CNV carriers using Cohen's  $d$  measure to  
168 provide a standardized measure of CNV-carriership effect size. The dominant PLS mode was  
169 characteristic of significantly altered behavior scores, with the shift being more prominent in CNV  
170 deletions (CNV - controls Cohen's  $d_{\text{DEL}} = -0.16$ ,  $d_{\text{DUP}} = -0.11$ ) (Fig. 2A). To find which phenotypes play a  
171 prominent role in the first mode, we calculated brain and behavior loadings. Our version of these  
172 loadings was here obtained by Pearson's correlation between a respective PLS score and the original  
173 measurement. As an example, each brain loading indexes the linear association strength between  
174 brain region measurements and brain scores in our reference group. Among the strongest brain  
175 effects, we observed the medial orbital sulcus (average of left and right hemisphere Pearson's  $r =$   
176  $0.25$ ), a part of the frontal lobe which may be involved in various cognitive functions, including  
177 decision-making, emotional processing, and social cognition<sup>20</sup>. Since duplication carriers displayed  
178 higher brain scores compared to controls and since medial orbital sulcus was associated with positive  
179 loading (higher volume = higher score), this result pointed to increased volume in this region for  
180 duplication carriers. Other strong negative loadings included the middle occipital sulcus, subcallosal  
181 area, superior occipital gyrus, or right lingual gyrus (Fig. 2B). We subsequently submitted these  
182 loadings to a bootstrap test to determine if they were significantly different from zero (cf. Methods).  
183 This test was based on 1,000 PLS model instances built on a randomly perturbed version of our ABCD  
184 participants created by sampling a participant cohort of the same sample size (with replacement). We  
185 further computed the relative number of significant region effects (i.e., loadings) among each set of  
186 regions belonging to one of the seven large-scale networks according to Schaefer-Yeo definitions. We  
187 observed that at least 50% of the loadings in each of the seven networks were significant, highlighting  
188 the brain-wide pattern of this first mode.

189 Furthermore, we inspected a broad portfolio of behavior characteristics interlocked with the  
190 above-described brain-level effects. To that end, we calculated behavior loadings similarly to brain  
191 loadings. The strongest loadings included family income (Pearson's  $r = 0.70$ ), poverty index (Pearson's  
192  $r = -0.68$ ), parental education (Pearson's  $r = 0.60$ ), measures of cognitive performance (Pearson's  $r = -$   
193  $0.57$ ), and also screen time or sleep duration (Pearson's  $r = 0.46$ ) (Fig. 2C). To obtain a synopsis of the  
194 dominant behavioral profile, we averaged absolute behavior loadings in each of the 20 categories.  
195 Demographics, cognitive, and socioeconomic categories had the strongest average loadings (average  
196 absolute Pearson's  $r > 0.22$ ). Since CNV carriers displayed higher expression compared to controls for  
197 this mode characterized by negative loading for measures of cognitive performance (lower  
198 performance = higher score), these results thus point to decreased cognitive abilities and real-life

199 functioning, especially in deletion carriers. Collectively, the dominant canonical mode highlighted the  
200 crosslinks between most of the brain networks and assessments of cognition and demographics.

201

202 The second PLS mode spotlighted opposing gene dosage effects on the brain structure that  
203 we identified to tie into family history of mental health. Specifically, we observed significant opposing  
204 brain average expressions for both deletions and duplication (Fig. 3A), which might reflect the  
205 mirroring effect on brain architecture previously reported for CNVs at specific genomic loci<sup>21</sup>. Only  
206 behavior scores in deletion carriers passed the significance testing. According to our obtained brain  
207 loadings, the mirroring brain scores were mainly driven by the lingual gyrus (across-hemisphere  
208 average Pearson's  $r = -0.38$ ), followed by supramarginal, precentral, or lateral superior temporal gyri  
209 (Fig. 3B). Despite being part of distinct brain networks, these regions were previously associated with  
210 neural mechanisms supporting complex cognitive tasks, especially those involving semantic  
211 processing or executive functions<sup>22,23</sup>. Collectively, following the conducted bootstrap significance  
212 test, most of the significant regions belonged to dorsal attention, somatomotor, and frontoparietal  
213 networks (more than 67% significant regions in each network). The interactions and coordinated  
214 activity of these networks are known to be essential for the efficient integration and execution of  
215 complex cognitive and motor tasks<sup>24</sup>.

216 The prominent deviations in behavior scores in deletion carriers can be explained by elevated  
217 assessments of mental well-being as revealed by behavior loadings. Specifically, phenotypes from the  
218 Child Behavior Checklist (CBCL) and the Adult Self Report (ASR) dominated the set of relevant behavior  
219 loadings (Fig. 3C). Particularly, the total scores of CBCL (Pearson's  $r = 0.80$ ) and ASR (Pearson's  $r = 0.77$ )  
220 emerged as the two strongest loadings. They were followed by measures of both parental and child  
221 anxiety, stress, depression as well as child sleep disorders. Indeed, when averaged across categories,  
222 the sleep category joined child behavior and parental questionnaires as the most prominent (average  
223 Pearson's  $r = 0.22$ ). The combination of flagged phenotypes from both children and adult assessments  
224 suggests that the second mode captures a comprehensive view of the well-being intricately tied to the  
225 family system. In addition, it points towards potential dynastic effects, i.e., the impacts of (inherited)  
226 genetic variants on family environments. Collectively, the second canonical mode proposed decreased  
227 familial mental well-being as a prominent marker of deletion carriers.

228

229 In the third and last canonical mode, we observed the relationship of the default mode and  
230 frontoparietal networks with environmental measures. Despite the mirrored effects on brain  
231 structure, the only significant shift was found for behavior scores in deletion carriers (Fig. 4A). The  
232 third mode was characterized by a strong contribution of the insula (average Pearson's  $r = 0.33$ ) as  
233 well as middle temporal and lateral superior temporal gyri (Fig. 4B). The majority of significant regions  
234 based on bootstrap testing was part of the default mode network or the frontoparietal network (23%  
235 and 20% of regions, respectively). These two networks belong to the multimodal end of the unimodal-  
236 to-multimodal characterization of large-scale brain networks. Prior research suggests that the  
237 relevance of these two networks and underlying regions could imply their crucial roles in cognitive  
238 flexibility and the integration of thought processes necessary for problem-solving and decision-  
239 making<sup>25</sup>.

240 Examining the behavior profile in the third canonical mode highlighted variables associated  
241 with the environment (Fig. 4C). Concretely, phenotypes related to the neighborhood, such as crime  
242 reports (Pearson's  $r = 0.63$ ), drug possession, violent crimes, adult offense, and feelings of safety  
243 emerged as strongly associated. These phenotypes reflect social and community dynamics, which

244 might affect the overall quality of life for individuals within that context. In summary, the third  
245 significant mode revealed an alteration in how environmental differences link to higher-order  
246 networks in adolescent deletion carriers.

247

### 248 **Decoding brain and behavioral patterns: Population, genetic and temporal perspectives**

249 After describing how genetic mutations influence the expression of behavior patterns, we  
250 explored how characteristics of genes encompassed in CNVs shaped behavior scores. In other words,  
251 for each individual with a deletion or duplication, we scored the genes inside a CNV using a total of  
252 seven complementary descriptions, including the average temporal expression, number of genes  
253 preferentially expressed in the brain, number of genes associated with autism spectrum disorder,  
254 schizophrenia, or broader portfolio of disorders, and a functional intolerance score: loss-of-function  
255 observed/expected upper bound fraction (LOEUF). LOEUF score provides insights into whether “Loss  
256 of function” variants in a given gene are under negative selection pressure in a population. It reflects  
257 the gene's functional impact by indicating how likely the gene will lead to disruptive changes when it  
258 is inactivated by a genetic variant. We then performed an exploratory analysis using Pearson's  
259 correlation between behavior scores and the quantitative descriptions of CNVs occurring in the  
260 genome (Fig. 5A). For deletions, the strongest observed association was with gene brain expression  
261 (Pearson's  $r = -0.10$ ,  $p_{\text{FDR}} = 0.13$ ). For duplications, the strongest observed association was with  
262 temporal gene expression (Pearson's  $r = -0.11$ ,  $p_{\text{FDR}} = 0.0006$ ). This result suggested deteriorating  
263 impact of altering dosage in genes expressed early during the human development. Other strongly  
264 associated description was the sum of LOEUF but, due to the limited number of CNV carriers, only the  
265 association with genetic temporal profile reached significance after applying False Discovery Rate  
266 (FDR) correction to control for multiple comparisons. Nevertheless, the reported associations can  
267 serve as valuable pointers for further research. In summary, our findings underscore the intricate  
268 relationship between genetic characteristics and behavioral outcomes, highlighting the importance of  
269 considering both genetic and temporal dimensions in understanding the etiology of behavioral  
270 patterns and susceptibility to disorders.

271

272 We then explored whether modes of population stratification, that is, specific  
273 sociodemographically defined groups, also influence the derived patterns. In other words, we  
274 quantified if ethnicity, sex, age, or genetic background are linked with the shifts in behavior scores. As  
275 a concrete example of this sensitivity analysis, we stratified participant-wise behavior scores for the  
276 first mode by reported ethnicity (Fig. 5B). Using one-way ANOVA, we assessed whether there were  
277 significant differences in scores as a function of these diverse ethnic categories. Notably, the findings  
278 revealed that the scores did not exhibit a statistically significant difference among ethnicities (F-  
279 statistic = 0.89, p-value = 0.56). We then extended this post-hoc analysis to other modes of population  
280 covariation and other metrics of population stratification. Namely, we quantified the difference in  
281 scores between males and females using a two-sample t-test and as a function of the 21 recruitment  
282 sites using one-way ANOVA. Moreover, we probed the association of scores with age and the ancestry  
283 structure of the cohort measured using the first ten principal components of genotyping data. We  
284 collected all p-values and applied FDR correction to control for multiple comparisons across the  
285 totality of 52 performed tests. None of the performed tests revealed significant association (Fig. 5C).  
286 This comprehensive examination provided valuable insights into the potential universality of the  
287 observed scores among modes of population stratification, underscoring the importance of  
288 considering the generalizability aspect in the broader context of the study's implications<sup>26</sup>.



289

290 As the final step, we extended our analyses by examining longitudinal changes in brain  
291 structure between controls and CNV carriers at the two-years-after imaging time point. Investigating  
292 the trajectory of brain development over time can provide insights into whether individuals with CNVs  
293 exhibit distinct patterns of structural change. We benefited from the availability of 3,654 brain scans  
294 measured two years after the first visit (48% of participants passing genetic quality control). We  
295 observed a high correlation between regional volumes acquired at these two time points (Sup. Fig. 3).  
296 We used a single PLS model that subsequently evaluated brain measurement from the baseline and  
297 2-year follow-up (cf. Methods). Put differently, a single PLS model provided a holistic summary of brain  
298 maturation by calculating a brain score for each participant in each visit across the three modes. As  
299 an example, similar to brain structure measurements, we observed a strong link between PLS scores  
300 in the dominant mode between the baseline and follow-up measurements in controls (Pearson's  $r =$   
301 0.90) (Fig. 5D). Furthermore, we used a bootstrap mean test (cf. Methods) to evaluate temporal  
302 change in brain scores in controls and CNV carriers across the three canonical modes (Fig. 5E). We  
303 found a significant decrease in the mean brain score only for the first canonical mode in controls ( $p$ -  
304 value<sub>FDR</sub> = 0.001). Nevertheless, both CNV groups displayed similar brain maturation patterns  
305 compared to controls. Given the observed similarity in brain structure developmental patterns of CNV  
306 carriers and controls, further exploration of earlier stages of life may provide valuable insights into  
307 distinctions in neurodevelopmental processes.

## 308 Discussion

309 In the current study, we carefully examined the ramifications of carrying an exonic CNV on  
310 brain organization and behavior. To this end, we designed an analytic framework based on a single  
311 holistic pattern-learning algorithm that can quantitatively dissect the impact of genetic mutations on  
312 a multimodal measurement that cut across disciplines to untangle the complex genes-brain-behavior  
313 interplay. This multivariate model uncovered three significant modes of brain-behavior covariation.  
314 The first mode connected volumetric differences in more than 50% of brain regions with measures of  
315 cognition and demographics. The second mode linked dorsal attention, somatomotor, and  
316 frontoparietal networks with mental health measures. Finally, the third mode highlighted associations  
317 between the higher-order networks and environmental factors. We then drew a detailed picture of  
318 how carrying a genomic deletion or duplication influences the expression of these comprehensive  
319 brain and behavior patterns. Specifically, both classes of CNVs were linked to adverse impacts on  
320 family well-being, as seen in the adverse effects on cognitive functioning, mental health, and  
321 socioeconomic outcomes. Our results also highlight the similar ramifications for cognition and  
322 behavior associated with deletions and duplication despite their distinct effects on brain anatomy,  
323 corroborating some of our earlier CNV-imaging studies on the UK Biobank<sup>8,27</sup>. Finally, we  
324 demonstrated that different genomic characteristics drive these shifts in behavior differentiation and  
325 brain maturation.

326  
327 Our results call for broadening the scope of genetic analyses in human health beyond what is  
328 traditionally considered. However, the analyses of genetic influences have long been dominated by  
329 univariate frameworks<sup>28,29</sup>. These standard regression approaches model one outcome variable at a  
330 time and thus focus on individual variables independently while neglecting the complex relationships  
331 and synergies that exist among genes, brain, and behavior. In other words, univariate approaches  
332 struggle with high-dimensional data and are prone to the "curse of dimensionality", making it  
333 challenging to capture the joint influence of multiple variables<sup>30</sup>. Scientists have long been waiting for  
334 multimodal datasets with deep phenotypic profiling of each participant. However, the availability of  
335 such resources prompts a change in our analytic toolkit<sup>31</sup>. PLS addresses several limitations of mass  
336 univariate approaches by embracing a doubly-multivariate strategy, providing a more nuanced and  
337 integrated perspective on the relationships between thousands of measures of brain architecture and  
338 behavior in the general population<sup>15,19</sup>. Prior research showed that genes are an important contributor  
339 to the interindividual variability of thus uncovered latent patterns<sup>32</sup>. Building on the heritability of the  
340 latent patterns, we showcased that their expression is further shaped by the presence of genome-  
341 wide protein-coding mutations, demonstrating their effects on social, familial, and environmental  
342 factors.

343  
344 The consequences for various aspects of human health and well-being often go unnoticed  
345 because analyses of genomic deletions and duplications most commonly focus on intellectual  
346 disability and developmental delay<sup>33,34</sup>. Developmental delay phenotypes, especially language and  
347 motor disorders, are the earliest symptoms for which children are clinically referred for assessments  
348 and genetic testing<sup>35</sup>. Recent results showcased potential lifelong implications represented by  
349 diminished academic qualifications, occupation or household income for a small set of schizophrenia-  
350 associated CNVs<sup>36</sup>. As an extension, our results demonstrated that the genome-wide presence of any  
351 coding CNV could lead to impaired real-life functioning, represented here by cognitive performance,  
352 income, education, screen time, or sleep duration. These characteristics played a driving role in our

353 dominant mode of population covariation. A similar dominant mode characterized by cognitive  
354 measures as well as screen time was identified in the HCP population resources<sup>19</sup>. The stronger  
355 influence of deletions on the dominant mode compared to duplications is concordant with the more  
356 pronounced effect of deletions on cognitive ability observed in clinical studies<sup>37</sup>. Therefore, the validity  
357 of the PLS-derived dimensions is corroborated by recapitulating key findings from previous clinical  
358 studies.

359 The power of our doubly-multivariate approach allowed us to reveal additional consequences  
360 beyond just the dominant population mode, which are at risk of staying hidden in classical analyses<sup>38</sup>.  
361 Concretely, our second mode highlighted impoverished familial mental well-being as a prominent  
362 marker of deletion carriers. Notably, the presence of phenotypes from both child and parental  
363 questionnaires demonstrates how well-being is closely tied to the family system as a whole. It has  
364 been estimated that over 99% of CNVs are inherited, whereas others arise de novo<sup>39</sup>. Therefore, in  
365 addition to influencing offspring phenotype through genetic inheritance, the parental genotype can  
366 indirectly influence offspring phenotype through its expression in the parental phenotype<sup>40</sup>. In other  
367 words, carriers of the gene-dosage alterations may show certain characteristics similar to the parent's  
368 condition. Where this occurs, offspring may be subject to both phenotype-associated CNV and  
369 phenotype-associated environments from parents. These dynastic effects, i.e. "inheritance" of the  
370 environment in addition to genotype, might explain how CNVs associated with difficult behavior in the  
371 parent's generation create unfavorable environments, which might inflate behavioral problems in  
372 children. In conclusion, the CNVs we studied in adolescents are likely to have been passed down from  
373 either parent, which points toward influences on the overall family system. The multigenerational  
374 impact where genetic and also environmental legacies contribute to the behavioral outcomes  
375 highlights the complex interplay between inherited genetic variations and the environments shaped  
376 by parental phenotypes.

377 Finally, our analyses also spotlighted genomic deletions as shifting the expression of the mode  
378 linking the environment and higher-order brain networks. Interestingly, the higher association cortex,  
379 especially the default mode network, was suggested to be more "life wired" – resulting from  
380 differences in the circumstances and contexts in which people grow up and everyday life  
381 experiences<sup>41</sup>. In other words, the deeper layers of the neural processing hierarchy, such as the default  
382 mode network, allow for greater environmental influence and plasticity, as demonstrated by  
383 prolonged maturation and slower myelination compared to sensory/motor circuits in human  
384 primates<sup>42,43</sup>. Our finding adds more evidence for the adaptive and dynamic nature of the recently  
385 evolved parts of the human brain, emphasizing the significant role of genetic and environmental  
386 interplay in shaping neural development and function. Importantly, the environmental milieu, here  
387 represented by measures of crimes, drug possession, or violence, is related to health through  
388 psychological, physiological, and behavioral pathways<sup>44</sup>. Prior research documented chronic health  
389 conditions to be more prevalent in low-income neighborhoods, including those affecting infants (low  
390 birth weight), children (asthma), and adults (cardiovascular health)<sup>45</sup>. Specifically, low socioeconomic  
391 status neighborhoods<sup>46</sup> and neighborhoods perceived as unsafe<sup>47</sup> displayed elevated physiological  
392 risk, which includes indicators of inflammation and neuroendocrine and cardiovascular functioning.  
393 Our study thus implies that genetic underpinnings that govern neurodevelopmental trajectories may  
394 potentially magnify the impact of environmental stressors on long-term health disparities.

395  
396 The effects of protein-coding alterations are not limited to a single brain circuit, such as the  
397 default mode network. Instead, we painted a detailed picture of effects on brain patterns spanning

398 the entire cortex. In concordance, a previous study identified brain-wide patterns of regional  
399 alterations that robustly differentiate controls from carriers of clinical CNVs<sup>8</sup>. Here, we broaden the  
400 incumbent analysis scope of a few selected CNVs towards any coding CNV present in the genome. We  
401 observed opposite effects of deletions and duplications, recapitulating the mirroring effects observed  
402 in clinical studies<sup>21</sup>. As a primary example, the lingual gyrus played a dominant role in two altered brain  
403 patterns. The effects of CNVs on this region have been documented for carriers of 16p11.2 CNVs<sup>48</sup>.  
404 Similarly, as prominent examples from the frontal lobe, we observed significant contributions of the  
405 middle and superior frontal gyrus, which have been shown to be impacted by 1q21.1<sup>49</sup>, resp. 15q11.2<sup>50</sup>  
406 alteration. Impairments of lingual and frontal gyri have been associated with anxiety-depression  
407 severity<sup>51</sup> or attention control deficit<sup>52</sup> – phenotypes often present in CNV carriers<sup>53</sup>. Though these  
408 examples are region-specific, our research indicates far-reaching implications across entire networks.  
409 While the identified whole-brain patterns represent a general trend in each class of genetic mutation,  
410 the specific alterations pertinent to a specific CNV (e.g., 22q11.2 or 16p11.2) are further molded by  
411 the attributes of genes that are affected by a given CNV. According to analyses, the final brain and  
412 behavior profile is shaped by various attributes, including the number of deleted/duplicated genes,  
413 their tolerance to being mutated, or the temporal expression profile of affected genes. This may be  
414 part of the reason why prior research found brain patterns associated with deletions at 22q11.2 loci  
415 to strongly resemble deletions at 15q11.2 loci while being different from 16p11.2 deletions<sup>8</sup>. In other  
416 words, the here-revealed brain modes represent the bedrock of the global CNV effect upon which the  
417 specific CNV effects unfold guided by the properties of encompassed genes, such as temporal and  
418 spatial expression profiles.

419  
420 In conclusion, we developed a multi-level pattern-learning framework to investigate the  
421 effects of genome-wide protein-coding mutations on brain organization and behavior. This approach  
422 offers a comprehensive view of the multifaceted impact of rare genetic variations, surpassing  
423 important limitations of traditional univariate frameworks. We revealed that both genomic deletions  
424 and duplications can lead to a toll on family well-being through associations with increased parental  
425 and child stress, anxiety and depression, as well as neighborhood violence. This demonstrates that the  
426 consequences of genetic mutations are far more extensive than just cognitive functioning, playing a  
427 significant role in shaping socioeconomic and environmental aspects of life experiences. Future  
428 research building on our multidisciplinary approach can better appreciate the complexity of the  
429 relationship between genetic determinants and human health.

430

## 431 **Methods**

### 432 **ABCD population data source**

433 Brain imaging, behavioral, clinical, and genetic data in this study were obtained from the  
434 Adolescent Brain Cognitive Development Study (ABCD; <https://abcdstudy.org/>), representing the  
435 most extensive biomedical child development study of its kind. The ABCD Study acquired data from  
436 11,877 children aged 9–10 years (mean age = 9.49 years) from 21 sites across the United States (48%  
437 girls; 57% Caucasian, 15% African American, 20% Hispanic, 8% other)<sup>54</sup>. We leveraged baseline  
438 measurements from ABCD Annual curated release 4.0 (<https://data-archive.nimh.nih.gov/abcd>). Data  
439 Release 4.0 contains baseline data on the entire participant cohort as well as early longitudinal data,  
440 including 2-year follow-up neuroimaging data (second brain imaging timepoint). All protocols for ABCD  
441 are approved by either a central or site-specific institutional review board committee<sup>55</sup>. Caregivers  
442 have provided written, informed consent and children provide verbal assent to all research  
443 protocols<sup>56</sup>. Additional information about the ABCD Study can be found in<sup>57</sup>. This dataset is  
444 administered by the National Institutes of Mental Health Data Archive and is freely available to all  
445 qualified researchers upon submission of an access request. All relevant instructions to obtain the  
446 data can be found at <https://nda.nih.gov/abcd/request-access>.

447

### 448 **Genetic annotation and CNV calling**

449 Our study is built on the identification of exonic CNVs in the ABCD study sample. The  
450 genotyping protocol for the ABCD sample has been described previously<sup>58</sup>. In addition to the QC  
451 provided by ABCD, we performed several additional steps to ensure high quality of the genetic data.  
452 Using PLINK v1.9<sup>59</sup>, we removed SNP variants with a missing rate > 5% as well as SNPs with a Hardy-  
453 Weinberg equilibrium exact test p-value < 0.0001. We only considered arrays with call rate ≥ 99 %, log  
454 R ratio SD < 0.35, B allele frequency SD < 0.08, the absolute value of wave factor < 0.05 and the count  
455 of all unfiltered CNV per sample ≤ 10. We also removed subjects with > 5 % missing rate (n = 73) and,  
456 all individuals with duplicated data (n = 419, high degree of identity-by-descent, PI\_HAT > 0.8) or with  
457 discordant phenotypic and genetic information regarding sex (n = 0).

458 The identification of CNVs using SNP array (GRCh37/hg19) data followed previously published  
459 methods<sup>34,60</sup>. CNVs were called using the pipeline described at  
460 <https://github.com/labjacquemont/MIND-GENESPARALLELCNV>. In short, we computed (PFB)-files  
461 (Human Genome Build NCBI37/hg19) based on 500 best arrays in ABCD, and we used GC (content)-  
462 model files (<https://kentinformatics.com> and <https://github.com/ucscGenomeBrowser/kent.git>).  
463 Only autosomal CNVs detected by both PennCNV<sup>61</sup> and QuantiSNP<sup>62</sup> were used, to minimize the  
464 number of potential false positives. All identified CNVs met stringent quality control criteria:  
465 confidence score ≥ 30 (for at least one of the two detection algorithms), size ≥ 50 kb, unambiguous  
466 type (deletion or duplication), overlap with segmental duplicates, and HLA regions or centromeric  
467 regions < 50 %. Finally, all carriers (n = 1) of a structural variant ≥ 10Mb, a mosaic CNV or a  
468 chromosome anomaly (aneuploidy or sexual chromosome anomaly) were removed. For the final set  
469 of participants, we calculated the first 10 genetic principal components (PCs) using the --pca function  
470 from PLINK v2.3<sup>63</sup>.

471 All identified CNVs were annotated using Gencode V19 (hg19) with ENSEMBL  
472 (<https://grch37.ensembl.org/index.html>). In this study, we only used exonic CNVs that fully  
473 encompassed at least one gene. In addition to the number of encompassed genes, each CNV was  
474 further annotated with seven other previously used scores. Specifically, we used an annotation  
475 quantifying the tolerance to protein-loss-of-function of each gene: Loss-of-function

476 Observed/Expected Upper bound Fraction -LOEUF<sup>64</sup>. Each CNV was then characterized by the sum of  
477 LOEUF of encompassed genes. Furthermore, CNVs were described using average temporal  
478 expression<sup>65</sup> and average peak epoch. Gene-wise temporal expression was calculated as the  
479 developmental trajectory that the gene follows based on trajectory analysis (gene-specific trajectory  
480 coding: 'Rising' = 1, 'Non-transitional' = 0, 'Falling' = -1). The peak epoch corresponds to an epoch of  
481 highest expression, where epochs correspond to the developmental period defined previously<sup>66</sup>. Each  
482 CNV was also characterized by the number of genes, which expressions in the brain were labeled as  
483 'High' or 'Elevated' according to the GTEx resource (<https://www.gtexportal.org>). Finally, we  
484 quantified how many genes in each CNV were previously associated with autism spectrum disorder  
485 (risk genes from ref. <sup>67</sup>, schizophrenia (risk genes from ref. <sup>68</sup>, and any disorder by either rare or  
486 common variation<sup>65</sup>. The similarity of the seven annotations is summarized in Sup. Fig. 5.

487 As part of our sensitivity analyses, we compiled a list of 85 CNVs previously proposed to be  
488 pathogenic<sup>10,33,69–71</sup> (sum of 1/LOEUF for each gene encompassed in CNV  $\geq 6$  or inclusion in ClinGen  
489 resource<sup>72</sup>). Regional coordinates are available in ref. <sup>34</sup>. CNV was defined as recurrent if it overlapped  
490  $\geq 40\%$  with one of the 85 CNVs and/or included the key genes of corresponding region (see details for  
491 each recurrent CNV in Supplementary Table 1).

492

### 493 **Deep phenotyping using behavioral, cognitive, and socio-demographic data**

494 We analyzed a rich battery of cognitive, socio-demographic and environmental data partially  
495 reported in prior research<sup>15</sup>. Tabulated data of 1,319 phenotypes measured at baseline from 11,879  
496 participants were imported and processed using Python. In line with previous research<sup>15</sup>, we used  
497 robust z-scores for the preprocessing of each phenotype. The robust z-scores are derived by  
498 calculating each phenotype's absolute deviation from the median absolute deviation (MAD)<sup>73</sup>. In other  
499 words, the resulting score indicates how many standard deviations each value deviates from the  
500 median, with robustness to outliers. Subsequently, we removed values with a z-score  $> 4$  ( $4 \times \text{MAD}$ ).  
501 We then excluded phenotypes with less than 75% retained values before excluding subjects with less  
502 than 75 % retained values across the retained phenotypes. The remaining subjects ( $n = 11,867$ ) were  
503 considered for further analysis. Finally, all data included in the study were visually checked by the  
504 same researcher (JK). The complete list of 962 phenotypes from 20 predefined categories included in  
505 the analysis is available in Table S1. As the last step, for the purpose of data analysis, missing values  
506 were imputed using the KNNImputer function ( $n\_neighbors = 5$ ,  $weights = \text{"uniform"}$ ) from the scikit-  
507 learn package. All derived phenotypic measures were then adjusted for variation that can be explained  
508 by age and sex.

509

### 510 **MRI imaging-derived phenotypes**

511 Our data sample included expert-curated brain-imaging phenotypes of grey matter  
512 morphology (T1w MRI). The images were acquired across 21 sites in the United States with  
513 harmonized imaging protocols for GE, Philips, and Siemens scanners<sup>74</sup>. We used baseline structural  
514 T1-weighted tabulated MRI data from ABCD curated release 4.0. We only included participants who  
515 passed quality assurance using the recommended QC parameters ( $n = 11,723$ ) described in the ABCD  
516 4.0 Imaging Instruments Release Notes. ABCD preprocessing and QC steps are described in detail in  
517 the methodological reference for the ABCD study<sup>74</sup>.

518 Tabulated brain-imaging phenotypes were guided by the topographical brain region  
519 definitions based on the Destrieux parcellation atlas<sup>75</sup>. This feature-generation step provides  
520 neurobiologically interpretable measures of gray matter volume in 148 regions. For each included

521 regional volume, we calculated the MAD for each brain region and removed values with  $MAD > 4^{15}$ .  
522 Subjects with less than 90% of regional volume retained in any region were excluded from the analysis.  
523 The remaining subjects ( $n = 11,723$ ) were included for further analysis. Finally, interindividual  
524 variations in the volumes that could be explained by nuisance variables outside primary interest were  
525 adjusted for by regressing out: age, sex, total brain volume, and scanning site.

526 We used the BrainStat toolbox<sup>76</sup> to contextualize obtained patterns with respect to large-scale  
527 brain networks defined by Schaefer-Yeo definition<sup>77</sup>. Specifically, we mapped the brain loadings sizes  
528 from the 148 regions to fsaverage5 vertices, which we then averaged across the seven resting state  
529 brain networks.

530 To analyze temporal changes in brain structure, we also acquired structural T1-weighted  
531 tabulated MRI data during the follow-up two years after the first MRI recording. Brain imaging data  
532 from this second time point underwent the same cleaning steps as the baseline brain imaging data. In  
533 total, follow-up brain measurements were available for 5,663 subjects.

534

### 535 **Multivariate pattern analysis protocol**

536 Our analysis aimed to reveal dominant modes of covariation between brain and behavior in  
537 the general population. Such a holistic perspective on complex brain-behavior relationships might be  
538 challenging to discern through univariate analyses. We leveraged 7,657 participants with both brain  
539 and behavior measurements that passed quality control. As a first data cleaning step, each brain and  
540 behavior measurement was normalized (z-scored) and submitted (separately for brain and behavior  
541 measurements) to principal component analysis (PCA) in order to increase the robustness of  
542 subsequent steps by avoiding potential issues with rank deficiency and fitting to noise. Based on a  
543 thorough examination, we extracted the first 100 PCA components for both the brain and behavior  
544 measurements (Sup. Fig. 6). It is noteworthy that although we used regional volumes as measures of  
545 brain structure, comparable results, especially for behavioral loadings, were obtained with regional  
546 thickness and area (Sup. Fig. 7).

547 After initial cleaning steps, we used measurements from the participants not carrying any CNV  
548 to reveal modes of covariation in the general population. Therefore, the first set of cleaned input  
549 variables comprised regional brain volumes ( $5,535 \times 100$  matrix) and the second input variable set was  
550 constructed from behavior measurement ( $5,535 \times 100$  matrix). We elected canonical partial least  
551 squares analysis (PLS) as a multivariate pattern learning approach that is ideally suited to delineate  
552 relationships between two high-dimensional sets of variables by identifying latent structures that  
553 maximize the covariance between them<sup>78</sup>. In other words, PLS involves finding canonical modes that  
554 maximize covariations between the weighted set (linear combination) of behavior measures and a  
555 weighted set (linear combination) of brain structure measures. These PLS modes are identified by  
556 solving the generalized eigenvalue problem of the brain-behavior cross-covariance matrix. The  
557 subject-wise latent variables (i.e., linear combinations of original measures) are called brain and  
558 behavior scores, respectively, throughout the manuscript. The ensuing set of PLS  $k$  orthogonal modes  
559 of variation were uncorrelated with each other and naturally ordered from the most to least  
560 important. Therefore, the first and strongest mode explained the largest fraction of covariance  
561 between brain and behavior measurements. Each ensuing mode captured a fraction of brain-behavior  
562 covariation not explained by one of the  $k - 1$  other modes. Notably, PLS draws similarities with  
563 canonical correlation analysis (CCA). However, CCA can be prone to instability<sup>79</sup>. Nevertheless, our  
564 obtained PLS solutions strongly resemble those obtained with CCA (Sup. Fig. 8).

565

## 566 **Contribution of original phenotypes to latent variables**

567 In order to quantify the contribution of each phenotype (e.g., regional volume or behavioral  
568 measure) to the construction of the latent structures, we computed PLS loading. These loadings are  
569 obtained as Pearson's correlation between a respective PLS score and the original measurement  
570 across subjects. The loadings thus indicate the strength and direction of the relationship between the  
571 original phenotype and the identified canonical components. Stronger loading values signify greater  
572 importance in contributing to the latent structures, offering insights into which variables drive the  
573 covariation patterns between brain architecture and behavior.

574 As a test for significance, above-chance phenotype contribution, we embraced a  
575 bootstrapping resampling strategy for the PLS model. In the first phase, a randomly perturbed version  
576 of the dataset was created by sampling controls with the same sample size with replacement. We  
577 repeated the bootstrap resampling procedure with 1,000 iterations. In so doing, we obtained different  
578 realizations of the entire analysis workflow and ensuing PLS model estimates. Concretely, the  
579 bootstrapping algorithm resulted in 1,000 instances of the trained PLS models used to obtain 1,000  
580 sets of associated PLS coefficients.

581 Statistically salient coefficients had a distribution of 1,000 PLS coefficients significantly  
582 different from 0. Specifically, they were robustly different from zero if their two-sided confidence  
583 interval according to the 2.5/97.5% bootstrap-derived distribution did not include zero coefficient  
584 value, indicating the absence of an effect.

585

## 586 **Optimal number of PLS dimensions in the general population**

587 Each identified PLS mode was entered into statistical significance tests of robustness  
588 consistent with an established combination of cross-validation and permutation testing<sup>15</sup> (Sup. Fig. 1).  
589 Initially, controls are split into 10 folds, where nine folds of participants are used as a train set, and  
590 one fold is used as a test set. The controls in the training set are used to estimate the parameters of  
591 all subsequent tools. In the first step, each brain or behavior measurement is z-scored column-wise  
592 across all controls in the training set. PCA then separately reduces the dimension of brain and behavior  
593 measurements to 100 features. In the next step, the behavior and brain measures are used as input  
594 variables to estimate a single multivariate canonical PLS model, where the output of the model is a set  
595 of scores (latent variables). This PLS model can also be characterized by weights (projection matrices  
596 used to transform input variables). PLS weights are back-projected using the PCA model to obtain  
597 brain and behavior weights in the original non-reduced ambient space.

598 In the next step, brain and behavior scores are computed for controls from the test set.  
599 Specifically, z-scoring followed by PCA dimensionality reduction is applied with parameters learned  
600 using the training set. The resulting preprocessed measurements are multiplied by PLS weights to  
601 obtain PLS scores for test-sample controls. Finally, the covariance between brain and behavior scores  
602 is calculated for each canonical mode. We took the average of these canonical covariances across the  
603 10 folds. This procedure is repeated 100 times with a random fold split of controls to obtain a  
604 distribution of out-of-sample covariances for each PLS mode.

605 To assess the significance of the resulting PLS modes, we ran 1,000 iterations of the same 10-  
606 fold cross-validation procedure described above, where the order of participants of the brain  
607 measurements was randomly permuted in each iteration. In contrast to the unpermuted dataset, we  
608 collected covariances for the training rather than the testing subjects to account for overfitting by the  
609 PLS. In other words, using covariance from the permuted train set, and not the test set, represents a



610 more stringent criterion. Finally, P values for each of the PLS modes were calculated as a percentage  
611 of cases when permuted covariance was greater than the mean cross-validated covariance.  
612

### 613 **Group differences in the expression of brain and behavior patterns**

614 One of the main objectives of our analyses was to investigate the effect of CNV carriership on  
615 the revealed modes of brain-behavior covariation. To that end, we developed a pipeline quantifying  
616 the differences in brain and behavior scores for the identified significant PLS mode (Sup. Fig. 1).  
617 Initially, participants without any CNV are split into a training set (80%) and a test set (20%). As  
618 described above, brain and behavior scores are computed for controls from the test set using  
619 parameters learned from the training set. In addition, brain and behavior scores are also calculated  
620 for CNV carriers (either deletion or duplication). Specifically, z-scoring followed by PCA dimensionality  
621 reduction is applied with parameters learned using the training set of controls. The resulting  
622 preprocessed measurements are multiplied by PLS weights to obtain PLS scores for CNV carriers.  
623 Finally, the differences in both brain and behavior scores between out-of-sample controls and CNV  
624 carriers are calculated for each canonical mode. This procedure is repeated 1,000 times with a random  
625 80:20 split of controls to obtain a distribution of PLS score differences. Finally, P values for each of the  
626 PLS modes were calculated as a percentage of cases when the difference between mean scores of  
627 CNV carriers and mean scores of out-of-sample controls was greater than zero (resp. lower for modes  
628 with negative mean expression).

629

### 630 **Temporal shift in brain pattern expressions**

631 In total, 3,654 participants passed the quality control of genetic data and had brain recordings  
632 measured at the baseline and 2-year follow-up. For these subjects, we compared brain scores from a  
633 single PLS model that subsequently evaluated brain baseline and follow-up measurements. In the first  
634 step, the parameters of a PLS model were estimated using baseline measurements of brain and  
635 behavior. Using these brain loadings, we then calculated a brain score for each participant in each visit  
636 across the significant PLS modes. Furthermore, we used a bootstrap mean test to evaluate if there  
637 was a significant temporal change in brain scores in controls and CNV carriers. In this non-parametric  
638 approach to statistical inference, 1,000 bootstrap samples are drawn with replacements from the  
639 brain scores. The mean is then calculated for each of these bootstrap samples, creating a distribution  
640 of sample means for both sets of brain scores. Finally, there is a significant difference in PLS scores  
641 between baseline and follow-up if the two-sided confidence interval according to the 2.5/97.5%  
642 distribution of 1,000 differences does not include zero.

643

### 644 **Effect size of CNV carriership**

645 We used Cohen's d to quantify the effect size of the CNVs on revealed PLS modes. For a given  
646 mode and separately for brain and behavior, Cohen's d is calculated as:

647 
$$d = \frac{\bar{x}_1 - \bar{x}_2}{\sqrt{\frac{s_1^2 + s_2^2}{2}}},$$

648 where  $\bar{x}_1$  corresponds to the mean PLS score across CNV carriers,  $\bar{x}_2$  corresponds to the mean PLS  
649 score across controls. Similarly,  $s_1$  and  $s_2$  correspond to standard deviations of PLS scores of CNV  
650 carriers and controls.

651

652 **Data availability**

653 The data supporting the findings of this study are available from the Adolescent Brain  
654 Cognitive Development (ABCD) dataset. The ABCD dataset is a publicly available resource accessible  
655 through the National Institute of Mental Health Data Archive (NDA). The specific data used in this  
656 study can be located within the ABCD dataset under X.

657

658 **Code availability**

659 The processing scripts and custom analysis software used in this work are available in a  
660 publicly accessible GitHub repository, along with examples of key visualizations in the paper:  
661 <https://github.com/dblabs-mcgill-mila/CNV-covariation>.

662

663 **References**

- 664 1. Thompson, P. M. *et al.* Genetic influences on brain structure. *Nat Neurosci* **4**, 1253–  
665 1258 (2001).
- 666 2. Timpson, N. J., Greenwood, C. M. T., Soranzo, N., Lawson, D. J. & Richards, J. B.  
667 Genetic architecture: the shape of the genetic contribution to human traits and disease.  
668 *Nat Rev Genet* **19**, 110–124 (2018).
- 669 3. Claussnitzer, M. *et al.* A brief history of human disease genetics. *Nature* **577**, 179–189  
670 (2020).
- 671 4. Manolio, T. A. *et al.* Finding the missing heritability of complex diseases. *Nature* **461**,  
672 747–753 (2009).
- 673 5. Conrad, D. F. *et al.* Origins and functional impact of copy number variation in the human  
674 genome. *Nature* **464**, 704–712 (2010).
- 675 6. Freeman, J. L. *et al.* Copy number variation: New insights in genome diversity. *Genome*  
676 *Res.* **16**, 949–961 (2006).
- 677 7. Auwerx, C. *et al.* The individual and global impact of copy-number variants on complex  
678 human traits. *Am J Hum Genet* S0002-9297(22)00061–1 (2022)  
679 doi:10.1016/j.ajhg.2022.02.010.
- 680 8. Kopal, J. *et al.* Rare CNVs and phenome-wide profiling highlight brain structural  
681 divergence and phenotypical convergence. *Nat Hum Behav* 1–17 (2023)  
682 doi:10.1038/s41562-023-01541-9.
- 683 9. Chawner, S. J. R. A. *et al.* Genotype-phenotype associations in children with copy  
684 number variants associated with high neuropsychiatric risk in the UK (IMAGINE-ID): a  
685 case-control cohort study. *Lancet Psychiatry* **6**, 493–505 (2019).
- 686 10. Marshall, C. R. *et al.* Contribution of copy number variants to schizophrenia from a  
687 genome-wide study of 41,321 subjects. *Nat Genet* **49**, 27–35 (2017).
- 688 11. Sanders, S. J. *et al.* A framework for the investigation of rare genetic disorders in  
689 neuropsychiatry. *Nat Med* **25**, 1477–1487 (2019).

- 690 12. Fuhrmann, D., Knoll, L. J. & Blakemore, S.-J. Adolescence as a Sensitive Period of  
691 Brain Development. *Trends Cogn Sci* **19**, 558–566 (2015).
- 692 13. Tost, H., Champagne, F. A. & Meyer-Lindenberg, A. Environmental influence in the  
693 brain, human welfare and mental health. *Nat Neurosci* **18**, 1421–1431 (2015).
- 694 14. Paus, T., Keshavan, M. & Giedd, J. N. Why do many psychiatric disorders emerge  
695 during adolescence? *Nat Rev Neurosci* **9**, 947–957 (2008).
- 696 15. Alnæs, D., Kaufmann, T., Marquand, A. F., Smith, S. M. & Westlye, L. T. Patterns of  
697 sociocognitive stratification and perinatal risk in the child brain. *Proceedings of the*  
698 *National Academy of Sciences* **117**, 12419–12427 (2020).
- 699 16. Dahl, R. E., Allen, N. B., Wilbrecht, L. & Suleiman, A. B. Importance of investing in  
700 adolescence from a developmental science perspective. *Nature* **554**, 441–450 (2018).
- 701 17. Millan, M. J. *et al.* Altering the course of schizophrenia: progress and perspectives. *Nat*  
702 *Rev Drug Discov* **15**, 485–515 (2016).
- 703 18. Casey, B. J. *et al.* The Adolescent Brain Cognitive Development (ABCD) study: Imaging  
704 acquisition across 21 sites. *Developmental Cognitive Neuroscience* **32**, 43–54 (2018).
- 705 19. Smith, S. M. *et al.* A positive-negative mode of population covariation links brain  
706 connectivity, demographics and behavior. *Nature Neuroscience* **18**, 1565–1567 (2015).
- 707 20. Stalnaker, T. A., Cooch, N. K. & Schoenbaum, G. What the orbitofrontal cortex does not  
708 do. *Nat Neurosci* **18**, 620–627 (2015).
- 709 21. Modenato, C. *et al.* Effects of eight neuropsychiatric copy number variants on human  
710 brain structure. *Transl Psychiatry* **11**, 1–10 (2021).
- 711 22. Hartwigsen, G. *et al.* Phonological decisions require both the left and right supramarginal  
712 gyri. *Proc Natl Acad Sci U S A* **107**, 16494–16499 (2010).
- 713 23. Mechelli, A., Humphreys, G. W., Mayall, K., Olson, A. & Price, C. J. Differential effects of  
714 word length and visual contrast in the fusiform and lingual gyri during reading. *Proc Biol*  
715 *Sci* **267**, 1909–1913 (2000).
- 716 24. Vossel, S., Geng, J. J. & Fink, G. R. Dorsal and Ventral Attention Systems.  
717 *Neuroscientist* **20**, 150–159 (2014).

- 718 25. Buckner, R. L., Andrews-Hanna, J. R. & Schacter, D. L. The brain's default network:  
719 anatomy, function, and relevance to disease. *Ann N Y Acad Sci* **1124**, 1–38 (2008).
- 720 26. Kopal, J., Uddin, L. Q. & Bzdok, D. The end game: respecting major sources of  
721 population diversity. *Nat Methods* **20**, 1122–1128 (2023).
- 722 27. Kopal, J. *et al.* Using rare genetic mutations to revisit structural brain asymmetry. *bioRxiv*  
723 2023.04.17.537199 (2023) doi:10.1101/2023.04.17.537199.
- 724 28. Bzdok, D. Classical Statistics and Statistical Learning in Imaging Neuroscience. *Front.*  
725 *Neurosci.* **0**, (2017).
- 726 29. Smith, S. M. & Nichols, T. E. Statistical Challenges in 'Big Data' Human Neuroimaging.  
727 *Neuron* **97**, 263–268 (2018).
- 728 30. Bzdok, D., Nichols, T. E. & Smith, S. M. Towards Algorithmic Analytics for Large-scale  
729 Datasets. *Nat Mach Intell* **1**, 296–306 (2019).
- 730 31. Bzdok, D. & Ioannidis, J. P. A. Exploration, Inference, and Prediction in Neuroscience  
731 and Biomedicine. *Trends in Neurosciences* **42**, 251–262 (2019).
- 732 32. Nicolaisen-Sobesky, E. *et al.* A cross-cohort replicable and heritable latent dimension  
733 linking behaviour to multi-featured brain structure. *Commun Biol* **5**, 1–11 (2022).
- 734 33. Cooper, G. M. *et al.* A Copy Number Variation Morbidity Map of Developmental Delay.  
735 *Nat Genet* **43**, 838–846 (2011).
- 736 34. Huguet, G. *et al.* Measuring and Estimating the Effect Sizes of Copy Number Variants on  
737 General Intelligence in Community-Based Samples. *JAMA Psychiatry* **75**, 447–457  
738 (2018).
- 739 35. Kim, S. H. *et al.* Language characterization in 16p11.2 deletion and duplication  
740 syndromes. *Am J Med Genet B Neuropsychiatr Genet* **183**, 380–391 (2020).
- 741 36. Kendall, K. M. *et al.* Cognitive performance and functional outcomes of carriers of  
742 pathogenic copy number variants: analysis of the UK Biobank. *Br J Psychiatry* **214**, 297–  
743 304 (2019).

- 744 37. Mollon, J., Almasry, L., Jacquemont, S. & Glahn, D. C. The contribution of copy number  
745 variants to psychiatric symptoms and cognitive ability. *Mol Psychiatry* 1–14 (2023)  
746 doi:10.1038/s41380-023-01978-4.
- 747 38. Wang, H.-T. *et al.* Finding the needle in a high-dimensional haystack: Canonical  
748 correlation analysis for neuroscientists. *Neuroimage* **216**, 116745 (2020).
- 749 39. McCarroll, S. A. *et al.* Integrated detection and population-genetic analysis of SNPs and  
750 copy number variation. *Nat Genet* **40**, 1166–1174 (2008).
- 751 40. Morris, T. T., Davies, N. M., Hemani, G. & Smith, G. D. Population phenomena inflate  
752 genetic associations of complex social traits. *Sci Adv* **6**, eaay0328 (2020).
- 753 41. Benkarim, O. *et al.* Population heterogeneity in clinical cohorts affects the predictive  
754 accuracy of brain imaging. *PLOS Biology* **20**, e3001627 (2022).
- 755 42. Glasser, M. F. & Van Essen, D. C. Mapping Human Cortical Areas In Vivo Based on  
756 Myelin Content as Revealed by T1- and T2-Weighted MRI. *J Neurosci* **31**, 11597–11616  
757 (2011).
- 758 43. Gogtay, N. *et al.* Dynamic mapping of human cortical development during childhood  
759 through early adulthood. *Proc Natl Acad Sci U S A* **101**, 8174–8179 (2004).
- 760 44. Schulz, A. & Northridge, M. E. Social determinants of health: implications for  
761 environmental health promotion. *Health Educ Behav* **31**, 455–471 (2004).
- 762 45. Pickett, K. E. & Pearl, M. Multilevel analyses of neighbourhood socioeconomic context  
763 and health outcomes: a critical review. *J Epidemiol Community Health* **55**, 111–122  
764 (2001).
- 765 46. Robinette, J. W., Charles, S. T. & Gruenewald, T. L. Neighborhood Socioeconomic  
766 Status and Health: A Longitudinal Analysis. *J Community Health* **42**, 865–871 (2017).
- 767 47. Robinette, J. W., Piazza, J. R. & Stawski, R. S. Neighborhood safety concerns and daily  
768 well-being: A national diary study. *Wellbeing, space and society* **2**, (2021).
- 769 48. Martin-Brevet, S. *et al.* Quantifying the Effects of 16p11.2 Copy Number Variants on  
770 Brain Structure: A Multisite Genetic-First Study. *Biological Psychiatry* **84**, 253–264  
771 (2018).

- 772 49. Modenato, C. *et al.* Lessons Learned From Neuroimaging Studies of Copy Number  
773 Variants: A Systematic Review. *Biological Psychiatry* **90**, 596–610 (2021).
- 774 50. Ulfarsson, M. O. *et al.* 15q11.2 CNV affects cognitive, structural and functional correlates  
775 of dyslexia and dyscalculia. *Transl Psychiatry* **7**, e1109 (2017).
- 776 51. Couvy-Duchesne, B. *et al.* Lingual Gyrus Surface Area Is Associated with Anxiety-  
777 Depression Severity in Young Adults: A Genetic Clustering Approach. *eNeuro* **5**,  
778 ENEURO.0153-17.2017 (2018).
- 779 52. Japee, S., Holiday, K., Satyshur, M. D., Mukai, I. & Ungerleider, L. G. A role of right  
780 middle frontal gyrus in reorienting of attention: a case study. *Front Syst Neurosci* **9**, 23  
781 (2015).
- 782 53. Alexander-Bloch, A. *et al.* Copy Number Variant Risk Scores Associated With Cognition,  
783 Psychopathology, and Brain Structure in Youths in the Philadelphia Neurodevelopmental  
784 Cohort. *JAMA Psychiatry* **79**, 699–709 (2022).
- 785 54. Volkow, N. D. *et al.* The conception of the ABCD study: From substance use to a broad  
786 NIH collaboration. *Dev Cogn Neurosci* **32**, 4–7 (2018).
- 787 55. Auchter, A. M. *et al.* A description of the ABCD organizational structure and  
788 communication framework. *Dev Cogn Neurosci* **32**, 8–15 (2018).
- 789 56. Paul, S. E. *et al.* Associations Between Prenatal Cannabis Exposure and Childhood  
790 Outcomes: Results From the ABCD Study. *JAMA Psychiatry* **78**, 64–76 (2021).
- 791 57. Garavan, H. *et al.* Recruiting the ABCD sample: Design considerations and procedures.  
792 *Dev Cogn Neurosci* **32**, 16–22 (2018).
- 793 58. Fan, C. C., Loughnan, R., Wilson, S., Hewitt, J. K., & ABCD Genetic Working Group.  
794 Genotype Data and Derived Genetic Instruments of Adolescent Brain Cognitive  
795 Development Study® for Better Understanding of Human Brain Development. *Behav*  
796 *Genet* **53**, 159–168 (2023).
- 797 59. Chang, C. C. *et al.* Second-generation PLINK: rising to the challenge of larger and richer  
798 datasets. *Gigascience* **4**, 7 (2015).



- 799 60. Huguet, G. *et al.* Genome-wide analysis of gene dosage in 24,092 individuals estimates  
800 that 10,000 genes modulate cognitive ability. *Mol Psychiatry* **26**, 2663–2676 (2021).
- 801 61. Wang, K. *et al.* PennCNV: an integrated hidden Markov model designed for high-  
802 resolution copy number variation detection in whole-genome SNP genotyping data.  
803 *Genome Res* **17**, 1665–1674 (2007).
- 804 62. Colella, S. *et al.* QuantiSNP: an Objective Bayes Hidden-Markov Model to detect and  
805 accurately map copy number variation using SNP genotyping data. *Nucleic Acids Res*  
806 **35**, 2013–2025 (2007).
- 807 63. Purcell, S. *et al.* PLINK: A Tool Set for Whole-Genome Association and Population-  
808 Based Linkage Analyses. *Am J Hum Genet* **81**, 559–575 (2007).
- 809 64. Karczewski, K. J. *et al.* The mutational constraint spectrum quantified from variation in  
810 141,456 humans. *Nature* **581**, 434–443 (2020).
- 811 65. Werling, D. M. *et al.* Whole-Genome and RNA Sequencing Reveal Variation and  
812 Transcriptomic Coordination in the Developing Human Prefrontal Cortex. *Cell Reports*  
813 **31**, 107489 (2020).
- 814 66. Kang, H. J. *et al.* Spatio-temporal transcriptome of the human brain. *Nature* **478**, 483–  
815 489 (2011).
- 816 67. Satterstrom, F. K. *et al.* Large-Scale Exome Sequencing Study Implicates Both  
817 Developmental and Functional Changes in the Neurobiology of Autism. *Cell* **180**, 568-  
818 584.e23 (2020).
- 819 68. Schizophrenia Working Group of the Psychiatric Genomics Consortium. Biological  
820 insights from 108 schizophrenia-associated genetic loci. *Nature* **511**, 421–427 (2014).
- 821 69. Coe, B. P. *et al.* Refining analyses of copy number variation identifies specific genes  
822 associated with developmental delay. *Nat Genet* **46**, 1063–1071 (2014).
- 823 70. Stefansson, H. *et al.* CNVs conferring risk of autism or schizophrenia affect cognition in  
824 controls. *Nature* **505**, 361–366 (2014).
- 825 71. Moreno-De-Luca, D. *et al.* Using large clinical data sets to infer pathogenicity for rare  
826 copy number variants in autism cohorts. *Mol Psychiatry* **18**, 1090–1095 (2013).

- 827 72. Welcome to ClinGen. <https://clinicalgenome.org/>.
- 828 73. Leys, C., Ley, C., Klein, O., Bernard, P. & Licata, L. Detecting outliers: Do not use  
829 standard deviation around the mean, use absolute deviation around the median. *Journal*  
830 *of Experimental Social Psychology* **49**, 764–766 (2013).
- 831 74. Hagler, D. J. *et al.* Image processing and analysis methods for the Adolescent Brain  
832 Cognitive Development Study. *Neuroimage* **202**, 116091 (2019).
- 833 75. Destrieux, C., Fischl, B., Dale, A. & Halgren, E. Automatic parcellation of human cortical  
834 gyri and sulci using standard anatomical nomenclature. *Neuroimage* **53**, 1–15 (2010).
- 835 76. Larivière, S. *et al.* BrainStat: A toolbox for brain-wide statistics and multimodal feature  
836 associations. *NeuroImage* **266**, 119807 (2023).
- 837 77. Schaefer, A. *et al.* Local-Global Parcellation of the Human Cerebral Cortex from Intrinsic  
838 Functional Connectivity MRI. *Cereb Cortex* **28**, 3095–3114 (2018).
- 839 78. Wegelin, J. A Survey of Partial Least Squares (PLS) Methods, with Emphasis on the  
840 Two-Block Case. *Technical report* (2000).
- 841 79. Mihalik, A. *et al.* Canonical Correlation Analysis and Partial Least Squares for Identifying  
842 Brain–Behavior Associations: A Tutorial and a Comparative Study. *Biological Psychiatry:*  
843 *Cognitive Neuroscience and Neuroimaging* **7**, 1055–1067 (2022).
- 844

## 845 **Acknowledgements**

846 DB was supported by the Brain Canada Foundation, through the Canada Brain Research Fund,  
847 with the financial support of Health Canada, National Institutes of Health (NIH R01 AG068563A, NIH  
848 R01 DA053301-01A1, NIH R01 MH129858-01A1), the Canadian Institute of Health Research (CIHR  
849 438531, CIHR 470425), the Healthy Brains Healthy Lives initiative (Canada First Research Excellence  
850 fund), the IVADO R<sup>3</sup>AI initiative (Canada First Research Excellence fund), and by the CIFAR Artificial  
851 Intelligence Chairs program (Canada Institute for Advanced Research). This research was also  
852 supported by Calcul Quebec (<http://www.calculquebec.ca>) and Compute Canada  
853 (<http://www.computecanada.ca>), the Brain Canada Multi-Investigator initiative, the Canadian  
854 Institutes of Health Research, CIHR\_400528, The Institute of Data Valorization (IVADO) through the  
855 Canada First Research Excellence Fund, Healthy Brains for Healthy Lives through the Canada First  
856 Research Excellence Fund. SJ is a recipient of a Canada Research Chair in neurodevelopmental  
857 disorders and a chair from the Jeanne et Jean Louis Levesque Foundation. KK was supported by The  
858 Institute of Data Valorization (IVADO) Postdoctoral Fellowship program through the Canada First  
859 Research Excellence Fund. BTTY is supported by the NUS Yong Loo Lin School of Medicine  
860 (NUHSRO/2020/124/TMR/LOA), the Singapore National Medical Research Council (NMRC) LCG  
861 (OFLCG19May-0035), NMRC CTG-IIT (CTGIIT23jan-0001), NMRC STaR (STaR20nov-0003), Singapore  
862 Ministry of Health (MOH) Centre Grant (CG21APR1009), the Temasek Foundation (TF2223-IMH-01),  
863 and the United States National Institutes of Health (R01MH120080 & R01MH133334). The funders  
864 had no role in study design, data collection and analysis, the decision to publish or the preparation of  
865 the manuscript.

866

867

## 868 **Author Contributions Statement**

869 DB and JK designed the study, analyzed brain and behavioral data, and drafted the manuscript.  
870 SJ, GH, ZS, and MJL called CNVs. DB and SJ contributed to the interpretation of the results and in the  
871 editing of the manuscript. All authors provided feedback on the manuscript. DB led data analytics.

872

873

## 874 **Competing Interests Statement**

875 DB is a shareholder and advisory board member at MindState Design Labs, USA. OAA is a  
876 consultant to Cortechs.ai. PT obtained grant support from Biogen, Inc., for research unrelated to this  
877 manuscript.

878

879 **Figure captions**

880 Figure 1

881 **Genome-wide CNVs impact brain-behavior relationships across distinct modes of population**  
882 **covariation**

883 A) Genome-wide CNV identification in the ABCD population cohort. We investigated 7,657 children  
884 from the ABCD database. In total, 5,535 children do not carry any protein-coding CNV, 514 carry a  
885 deletion and 1,472 carry a duplication fully encompassing one or more genes. 136 participants carried  
886 both deletion and duplication. The ratio of males and females is similar in every group (*left plot, inner*  
887 *circle*). The age of participants is similar across different CNV groups (*right plot*). B) CNV characteristics.  
888 The most common kind of CNV is a deletion/duplication encompassing a few genes. On average,  
889 duplications contain more genes than deletions in the ABCD cohort. C) Partial least squares model  
890 links the brain with behavior in one holistic model. We estimate a multivariate relationship structure  
891 among 148 brain atlas volume measures and ~1000 behavior measures spanning 20 categories based  
892 on measurements from children without any CNV. The canonical scores represent the latent variable  
893 expressions calculated from linear combinations of the original brain and linear combinations of  
894 behavior measurements that maximize the covariance between the two sets of variables.  $k$  is the  
895 number of phenotypes per category. D) CNV status impacts individual expression strengths of brain  
896 and behavior patterns. We compared the average brain and behavior scores for CNV carriers with  
897 control participants not used to derive model parameters (i.e., controls not seen by the model during  
898 training). Stars denote significant differences based on cross-validation testing (cf. Methods). These  
899 results reveal that carrying a CNV significantly impacts canonical scores across different modes of  
900 brain-behavior covariation, emphasizing the utility of a multivariate holistic framework that cuts  
901 across single disciplines.

902

903 Figure 2

904 **The leading population mode tracks decreased cognitive functioning in CNV carriers**

905 A) CNVs significantly impact revealed dominant behavior pattern. Cohen's  $d$  values of canonical scores  
906 calculated between controls and separately carriers of deletions and duplications are plotted for the  
907 first canonical mode. Both deletion and duplication carriers show a significant shift in behavior scores,  
908 with a stronger effect for deletions. Only duplications display significantly affected brain scores.  
909 Significant differences are represented by solid dots. B) Brain region correlates reveal a whole-brain  
910 pattern. Brain loadings are calculated as the correlation between brain scores and 148 regional brain  
911 volumes. The bar plot depicts 20 regions with the strongest brain loadings, including a 95% confidence  
912 interval based on the bootstrap resampling. G denotes gyrus, and S denotes sulcus. The radial bar  
913 chart shows the percentage of significant brain loadings in each of the seven large-scale networks  
914 based on the bootstrap significance test. C) Behavior correlates highlight real-life functioning.  
915 Behavior loadings are calculated as the correlation between behavior scores and ~1000 behavior  
916 measures. The strongest behavior loadings include a variety of cognitive scores (i.e., summaries of  
917 tasks focused on language and vocabulary comprehension, working memory, abstract reasoning, or  
918 problem-solving), parental education, or family income. On average, the demographic,  
919 socioeconomic, and cognitive categories display the strongest coefficients. In summary, the first  
920 canonical mode highlights the connection between most of the brain networks and assessments of  
921 cognition and demographics.

922

923 Figure 3

924 **The second population mode spotlights shift in brain scores associated with mental wellbeing**

925 A) Canonical scores untangle gene dosage-induced differences and similarities. Deletions and  
926 duplications lead to mirrored significant brain scores. On the other hand, only deletions display  
927 significantly affected behavior scores. Significant differences are represented by solid points. B) Three  
928 large-scale brain networks dominate brain loadings. The lingual gyrus (G=gyrus, S=sulcus) displays the  
929 strongest loading of all regions. Summarized by large-scale networks, the highest percentage of  
930 significant brain loadings is present for the dorsal attention, somatomotor, and frontoparietal  
931 networks. C) Behavior loadings stress the importance of mental well-being. The strongest behavior  
932 loadings include parental and child-reported levels of problems, stress, anxiety, and depression.  
933 Therefore, this mode was dominated by mental well-being phenotypes mainly from parental behavior,  
934 child questionnaires, and sleep categories based on the average absolute loadings. Collectively, the  
935 second canonical mode proposes decreased mental well-being as a significant marker of deletion  
936 carriers.

937

938 Figure 4

939 **The third population mode links higher order networks to environment measures**

940 A) Deletions, unlike duplications, shape behavior scores. In the third canonical mode, the only  
941 significant effect is for behavior scores in deletion carriers. Significant differences are represented by  
942 solid points. B) Higher-order networks play a prominent role in the third canonical mode. The anterior  
943 insula, followed by the middle temporal gyrus (G=gyrus, S=sulcus), are regions most strongly  
944 associated with brain scores. Furthermore, the default mode network, along with the frontoparietal  
945 network, displays the highest percentage of significant regions based on the bootstrap significant test.  
946 C) Environmental variables characterize behavior loadings. Measures of neighborhood violence, safety  
947 and crime are among the strongest loadings. These environment-associated phenotypes come  
948 primarily from the socioeconomic category. The third significant mode illustrates how deletions shift  
949 the expression of the mode linking the environment and higher-order networks.

950

951 Figure 5

952 **Population modes are driven by temporal gene characteristics rather than sociodemographic**  
953 **factors**

954 A) Behavior scores driven by temporal and spatial expression. Genes encompassed in each CNV were  
955 characterized based on seven different metrics. Summaries across all the deleted/duplicated genes  
956 for each CNV carrier were used to provide subject-specific annotations. Across the three different  
957 modes, behavior scores are most strongly associated with temporal expression, brain expression, and  
958 LOEUF scores. The three modes are labeled based on their dominant phenotype. \* denotes significant  
959 association after FDR correction. B) Behavior scores not explained by ethnicity. As an example,  
960 behavior scores of the first canonical model are plotted for all subjects separated by participant  
961 ethnicity. The rain cloud plot combines a scatter plot, a box plot (whiskers equal to 1.5 times the  
962 interquartile range), and a violin plot. There is no significant difference in mean score expression  
963 across the 16 ethnicities. C) Canonical modes not reflective of sociodemographic factors. In addition  
964 to ethnicity, behavior scores across the three analyzed modes do not significantly differ based on sex,  
965 age, site, and the first ten genetic components capturing major patterns of genetic variation. D)  
966 Canonical modes capture brain maturation. A single PLS model evaluated brain measurement from  
967 the baseline and 2-year follow-up measurements. The star denotes significant change based on a  
968 bootstrap mean test. Both measurements are highly correlated. E) Similar cortical aging across all 3  
969 groups. As an extension, we examine the difference between baseline and 2-year follow-up  
970 measurements for all CNV groups and all three canonical modes. The arrow direction symbolizes the  
971 direction of change. Significant changes are represented by solid markers and a star. Both CNV groups  
972 display similar patterns of brain aging compared to controls, with particular change significant for the  
973 first canonical mode.

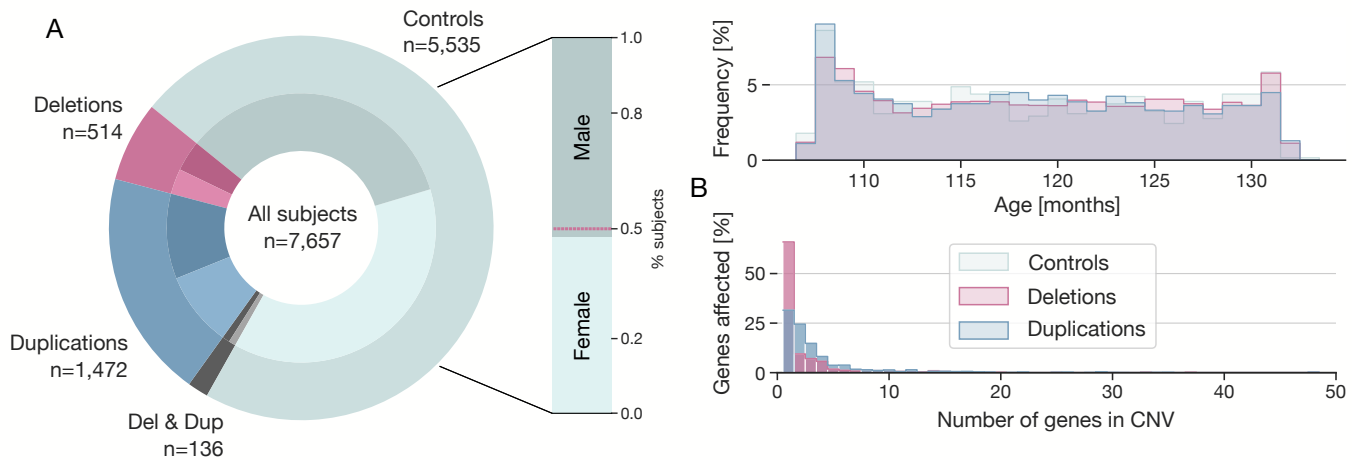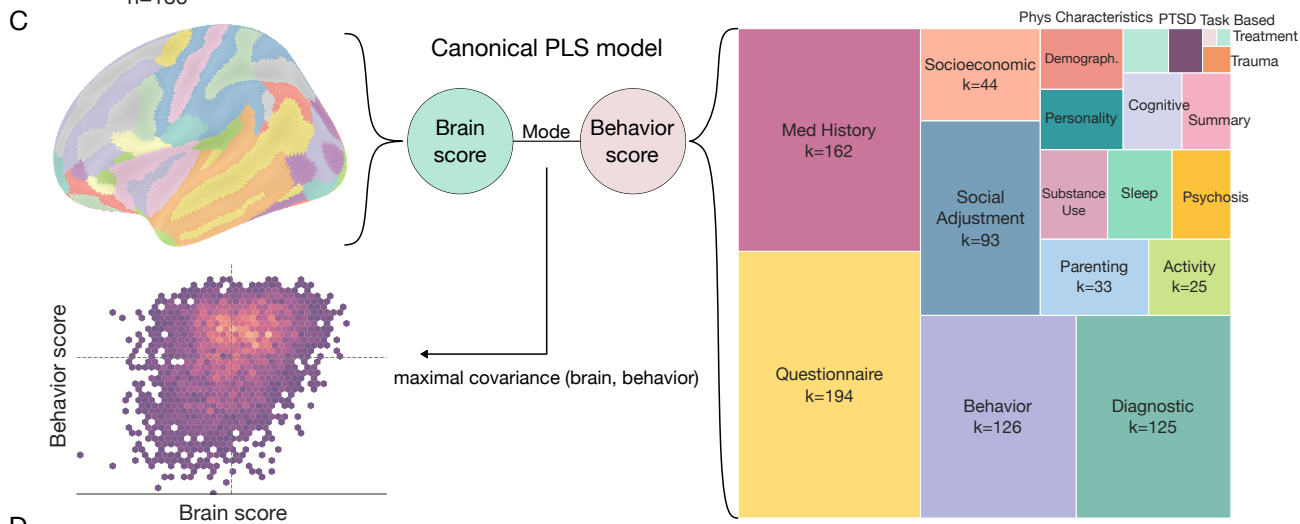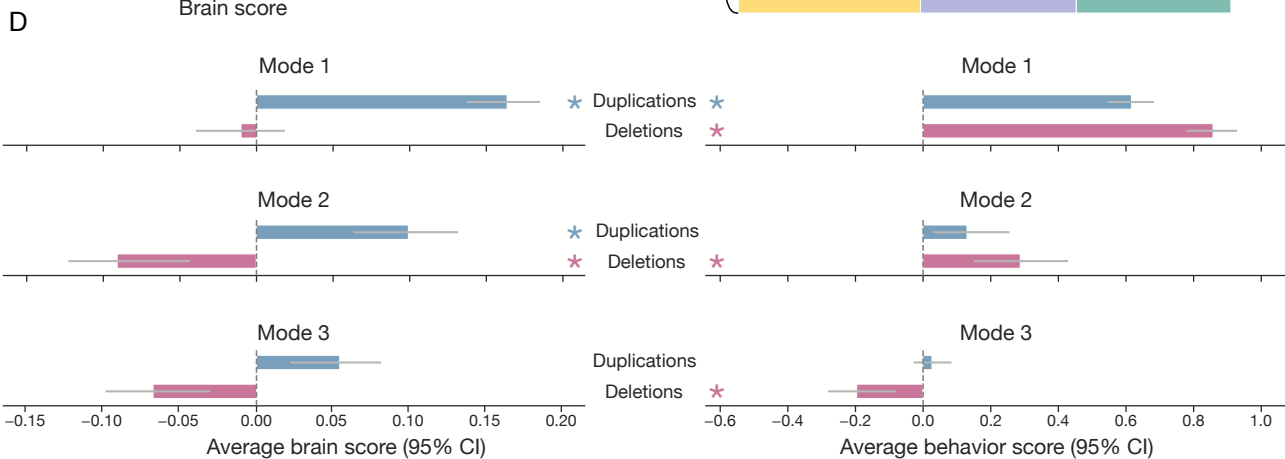

A

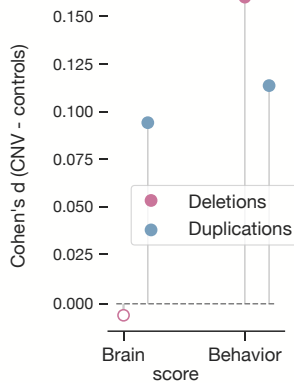

B

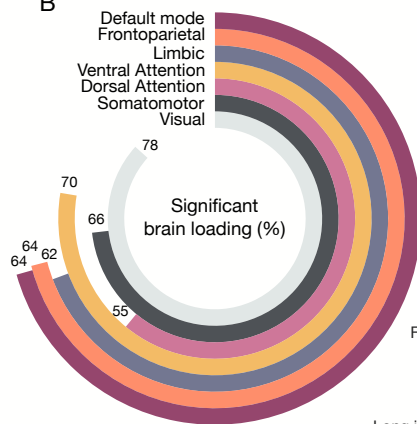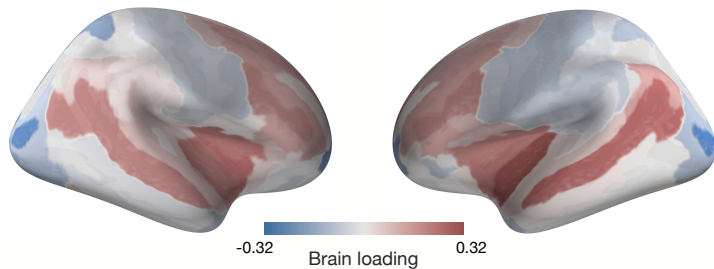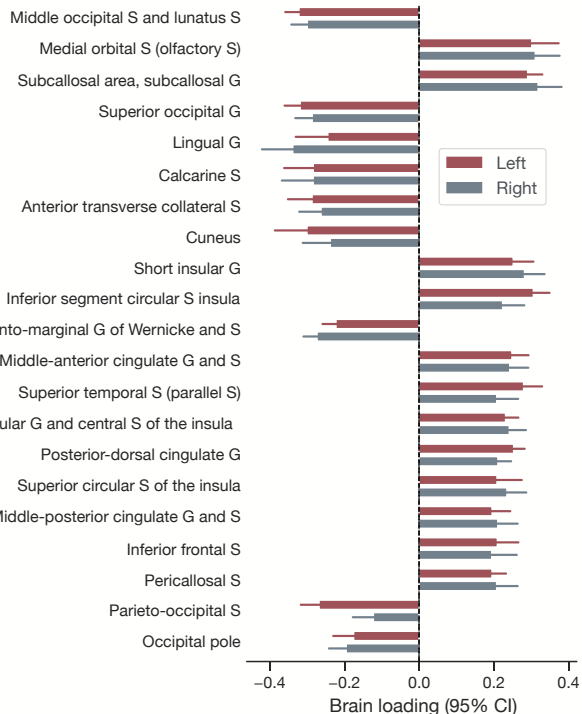

C

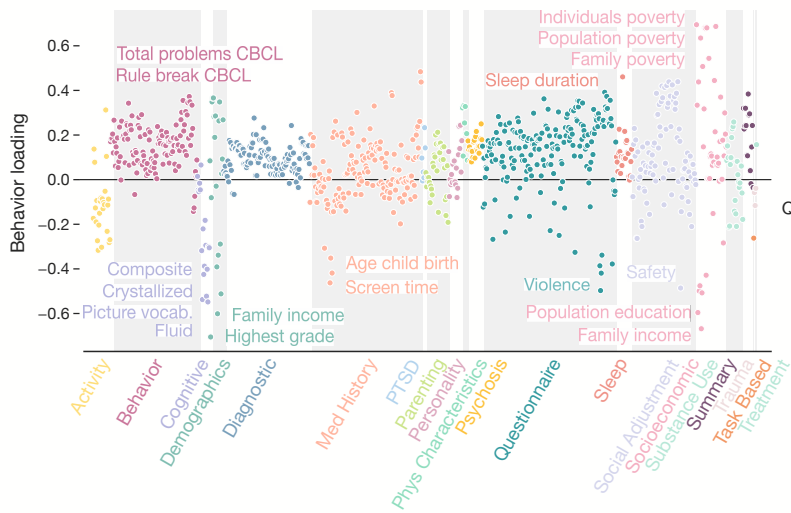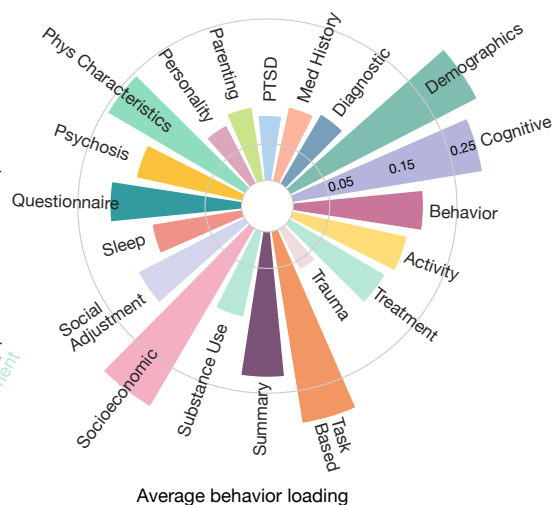



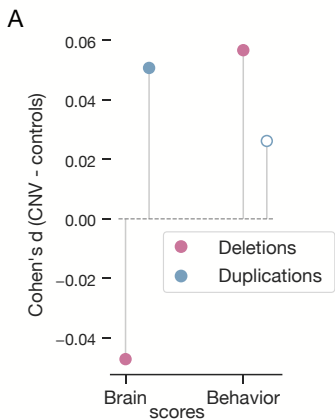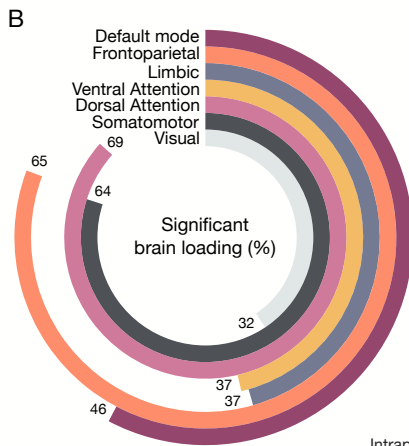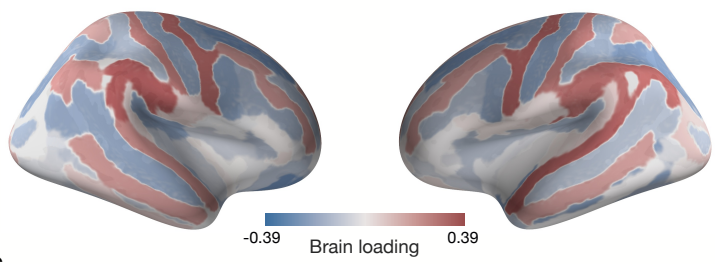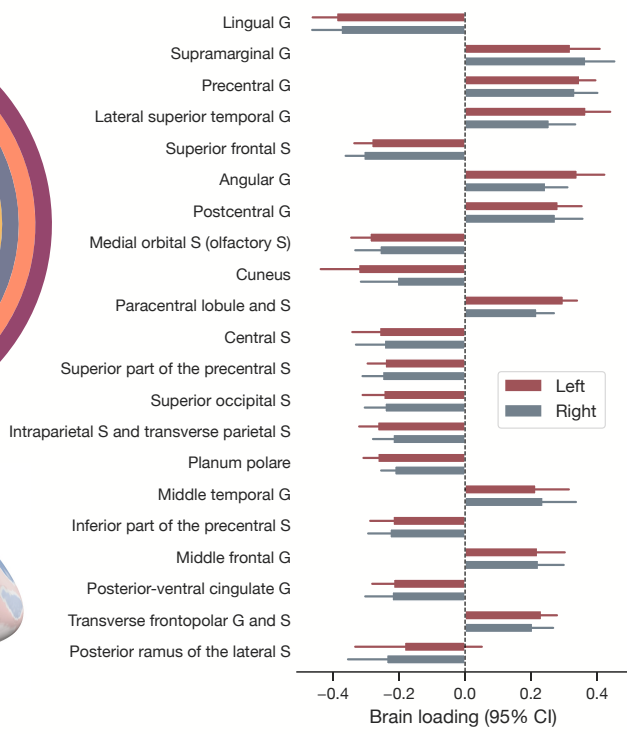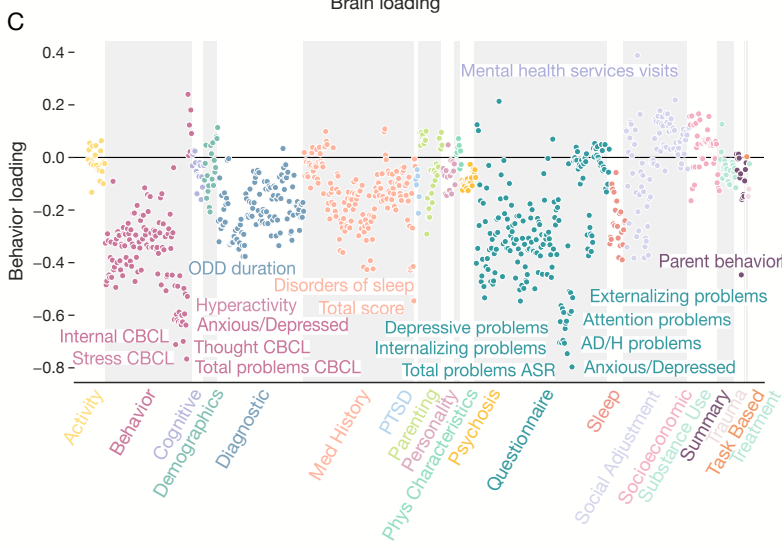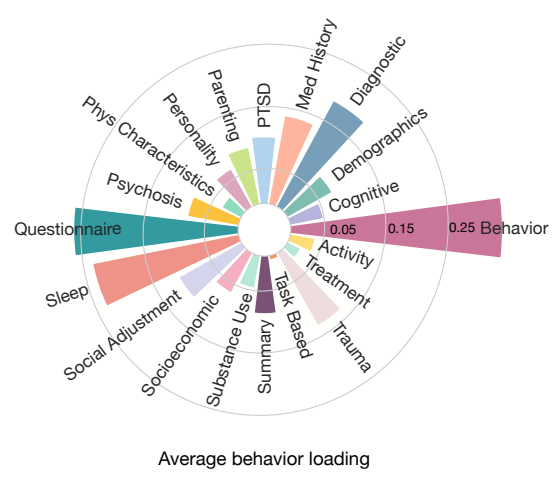

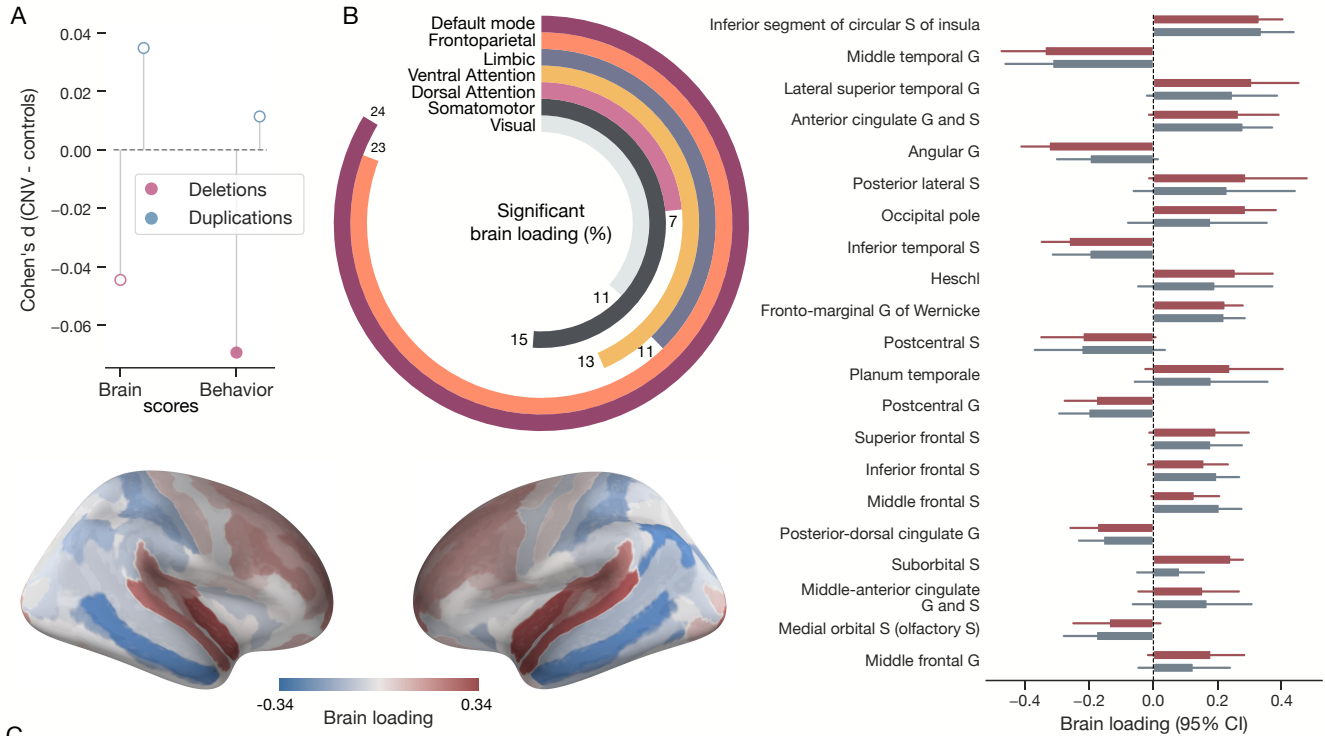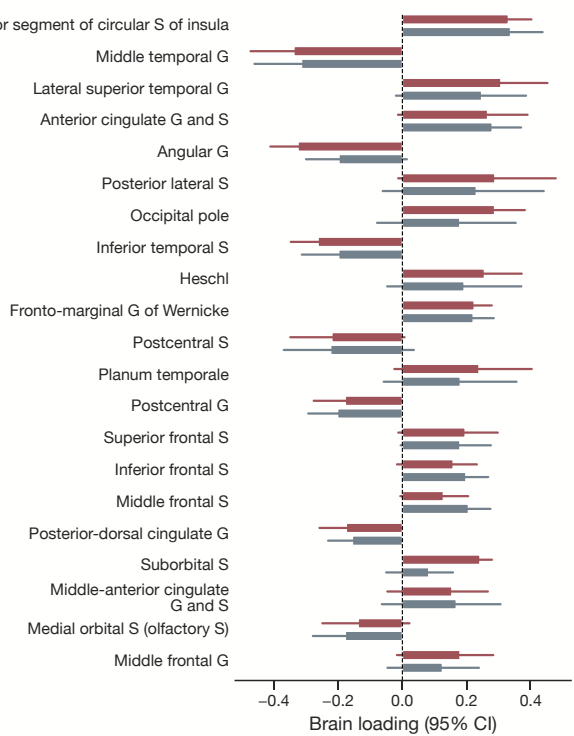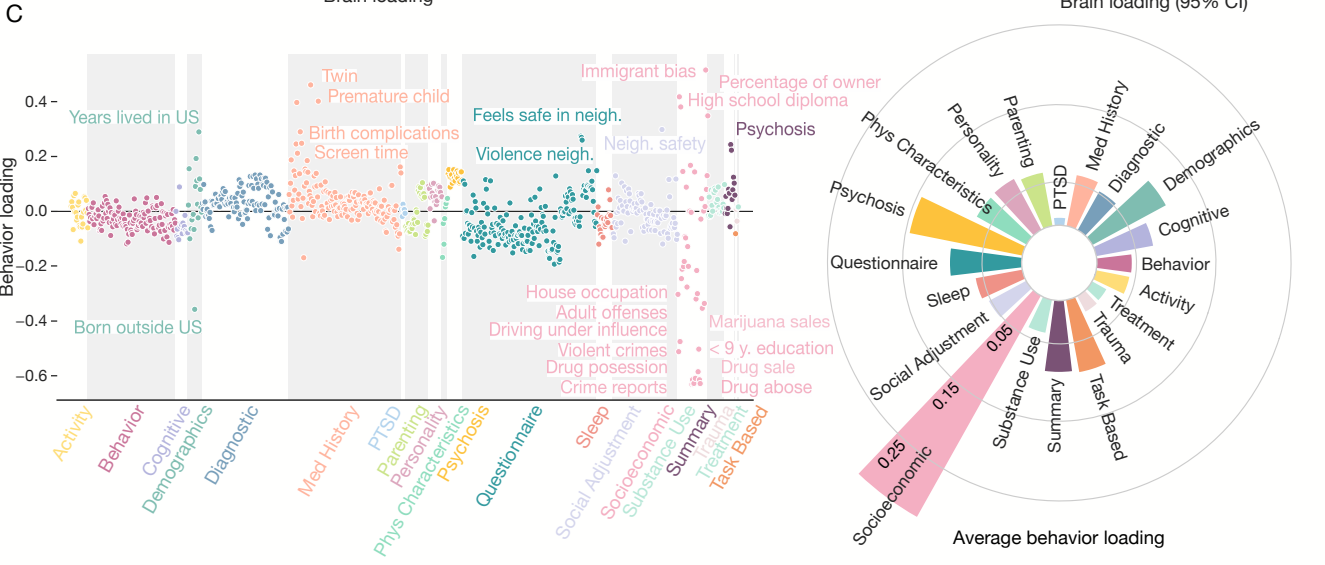

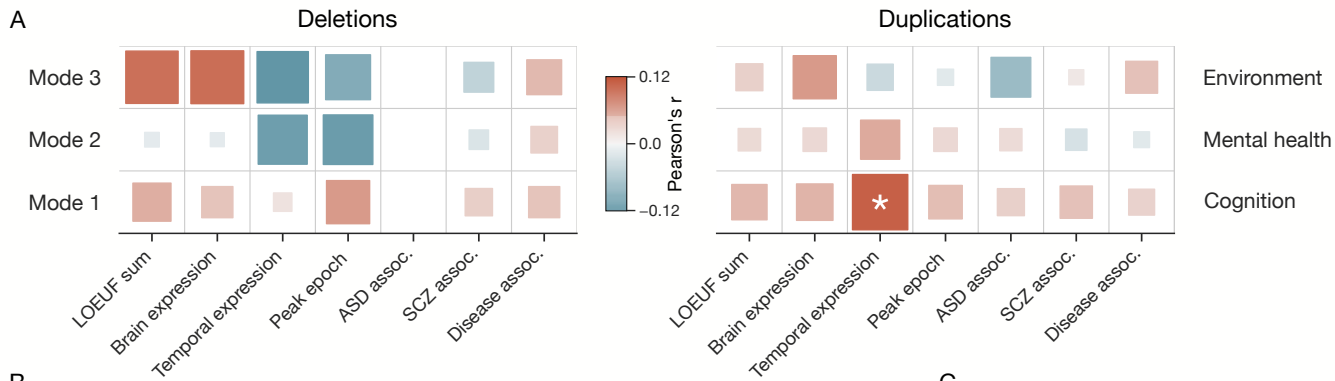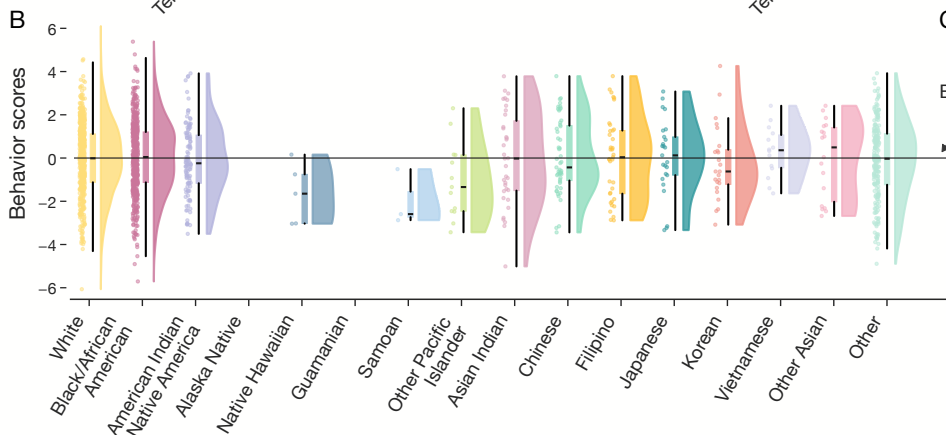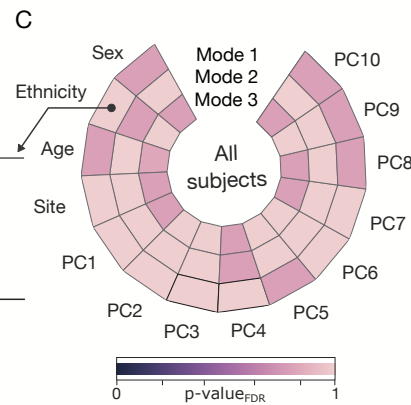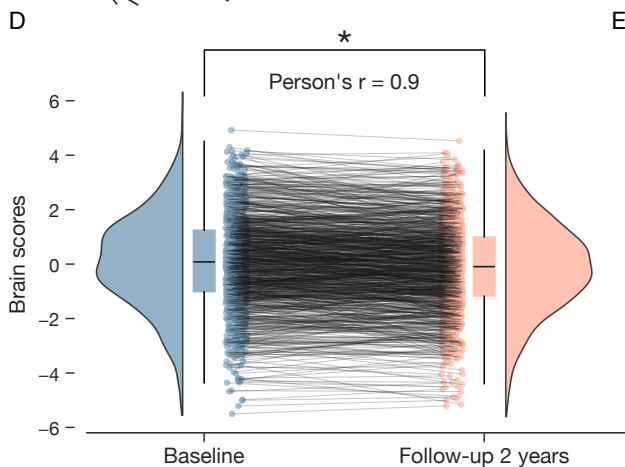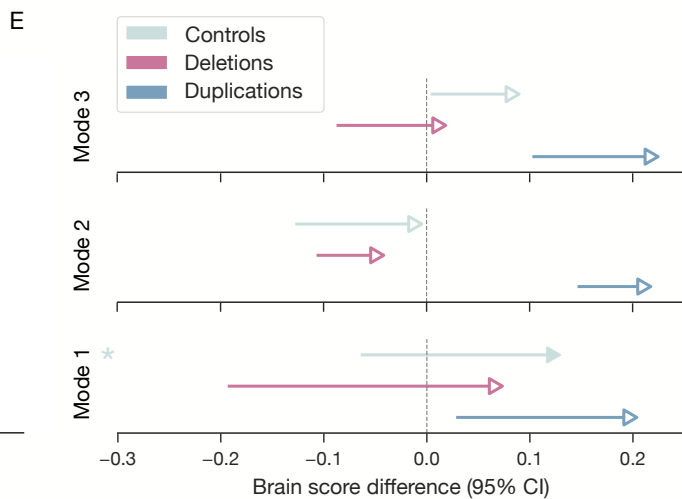

Source: https://medrxiv.org/content/10.1101/2024.05.21.24307729v1.full.pdf
